# Supplementary material for: Amidines from cyclic amines and nitriles in the presence of zinc(ii): other nitriles in place of acetonitrile
Source: Royal Society of Chemistry journal article supplement (doi:10.1039/d2nj04668g), 2022-01-01

Supporting information

for

**Amidines from cyclic amines and nitriles in the presence of zinc(II):  
Other nitriles in place of acetonitrile**

Nina Podjed and Barbara Modec

*Department of Chemistry and Chemical Technology  
University of Ljubljana  
Večna pot 113, 1000 Ljubljana, Slovenia*

E-mails: [barbara.modec@fkkt.uni-lj.si](mailto:barbara.modec@fkkt.uni-lj.si), [nina.podjed@fkkt.uni-lj.si](mailto:nina.podjed@fkkt.uni-lj.si)

## Contents

|                                                                |     |
|----------------------------------------------------------------|-----|
| 1. Crystal structures of zinc(II) complexes with intact amines | S3  |
| 2. Intermolecular interactions and connectivity patterns       | S8  |
| 3. Infrared spectroscopy                                       | S11 |
| 4. NMR spectroscopy                                            | S24 |

## List of compounds

|                                                                                 |                                         |
|---------------------------------------------------------------------------------|-----------------------------------------|
| [Zn(quin) <sub>2</sub> (pipe)]·CH <sub>3</sub> CH <sub>2</sub> CN               | <b>1·CH<sub>3</sub>CH<sub>2</sub>CN</b> |
| [Zn(quin) <sub>2</sub> (pipe) <sub>2</sub> ]·CH <sub>3</sub> CH <sub>2</sub> CN | <b>2·CH<sub>3</sub>CH<sub>2</sub>CN</b> |
| [Zn(quin) <sub>2</sub> (pipe) <sub>2</sub> ]·2.5PhCN                            | <b>2·2.5PhCN</b>                        |
| [Zn(quin) <sub>2</sub> (pyro)]                                                  | <b>3</b>                                |
| [Zn(quin) <sub>2</sub> (pyro) <sub>2</sub> ]                                    | <b>4</b>                                |
| [Zn(quin) <sub>2</sub> (pipepropioam)]                                          | <b>5</b>                                |
| pipepropioamH[Zn(quin) <sub>3</sub> ]                                           | <b>6</b>                                |
| pyropropioamH[Zn(quin) <sub>3</sub> ]                                           | <b>7</b>                                |
| [Zn(quin) <sub>2</sub> (pipebenzoam)]                                           | <b>8a, 8b</b>                           |
| [Zn(quin) <sub>2</sub> (pyrobenzoam)]                                           | <b>9a, 9b</b>                           |
| pipebenzoamH[Zn(quin) <sub>3</sub> ]                                            | <b>10</b>                               |
| pyrobenzoamH[Zn(quin) <sub>3</sub> ]                                            | <b>11</b>                               |
| pyrobenzoamH[Zn(quin) <sub>3</sub> ]·[Zn(quin) <sub>2</sub> (pyrobenzoam)]      | <b>12</b>                               |

## 1. Crystal structures of zinc(II) complexes with intact amines

The zinc(II) complexes with amines, piperidine, pyrrolidine and morpholine, form part of our previous study.<sup>S1</sup> During current investigation, single-crystals of a few more complexes with piperidine or pyrrolidine were obtained. Of particular importance are the crystal structures of the pyrrolidine complexes which have not been determined before. A brief description of the structures of [Zn(quin)<sub>2</sub>(pyro)] (**3**) and [Zn(quin)<sub>2</sub>(pyro)<sub>2</sub>] (**4**) is given below. The crystal data of the complexes with amines are given in Table S1.

**Table S1.** Crystallographic data for **1·CH<sub>3</sub>CH<sub>2</sub>CN–4**.

|                                                          | <b>1·CH<sub>3</sub>CH<sub>2</sub>CN</b>                          | <b>2·CH<sub>3</sub>CH<sub>2</sub>CN</b>                          | <b>2·2.5PhCN</b>                                                       | <b>3</b>                                                         | <b>4</b>                                                         |
|----------------------------------------------------------|------------------------------------------------------------------|------------------------------------------------------------------|------------------------------------------------------------------------|------------------------------------------------------------------|------------------------------------------------------------------|
| <b>Empirical formula</b>                                 | C <sub>28</sub> H <sub>28</sub> N <sub>4</sub> O <sub>4</sub> Zn | C <sub>33</sub> H <sub>39</sub> N <sub>5</sub> O <sub>4</sub> Zn | C <sub>47.5</sub> H <sub>46.5</sub> N <sub>6.5</sub> O <sub>4</sub> Zn | C <sub>24</sub> H <sub>21</sub> N <sub>3</sub> O <sub>4</sub> Zn | C <sub>28</sub> H <sub>30</sub> N <sub>4</sub> O <sub>4</sub> Zn |
| <b>Formula weight</b>                                    | 549.91                                                           | 635.06                                                           | 837.78                                                                 | 480.81                                                           | 551.93                                                           |
| <b>Crystal system</b>                                    | monoclinic                                                       | monoclinic                                                       | triclinic                                                              | monoclinic                                                       | monoclinic                                                       |
| <b>Space group</b>                                       | <i>Cc</i>                                                        | <i>P 2<sub>1</sub>/n</i>                                         | <i>P</i> –1                                                            | <i>C 2/c</i>                                                     | <i>P 2/c</i>                                                     |
| <b><i>T</i> [K]</b>                                      | 150.00(10)                                                       | 150.05(10)                                                       | 150.00(10)                                                             | 150.00(10)                                                       | 150.00(10)                                                       |
| <b><i>λ</i> [Å]</b>                                      | 0.71073                                                          | 0.71073                                                          | 0.71073                                                                | 0.71073                                                          | 0.71073                                                          |
| <b><i>a</i> [Å]</b>                                      | 9.57440(10)                                                      | 13.8766(5)                                                       | 7.6600(2)                                                              | 13.7196(4)                                                       | 18.6335(9)                                                       |
| <b><i>b</i> [Å]</b>                                      | 24.2668(4)                                                       | 7.5530(2)                                                        | 14.7528(5)                                                             | 8.0117(2)                                                        | 13.7763(6)                                                       |
| <b><i>c</i> [Å]</b>                                      | 10.97570(10)                                                     | 14.5911(5)                                                       | 18.8900(6)                                                             | 19.1729(5)                                                       | 19.9630(13)                                                      |
| <b><i>α</i> [°]</b>                                      | 90                                                               | 90                                                               | 91.319(3)                                                              | 90                                                               | 90                                                               |
| <b><i>β</i> [°]</b>                                      | 96.5300(10)                                                      | 91.303(3)                                                        | 97.791(2)                                                              | 105.783(3)                                                       | 103.298(6)                                                       |
| <b><i>γ</i> [°]</b>                                      | 90                                                               | 90                                                               | 97.798(2)                                                              | 90                                                               | 90                                                               |
| <b><i>V</i> [Å<sup>3</sup>]</b>                          | 2533.55(5)                                                       | 1528.90(9)                                                       | 2093.56(11)                                                            | 2027.98(10)                                                      | 4987.1(5)                                                        |
| <b><i>Z</i></b>                                          | 4                                                                | 2                                                                | 2                                                                      | 4                                                                | 8                                                                |
| <b><i>D</i><sub>calc</sub> [g/cm<sup>3</sup>]</b>        | 1.442                                                            | 1.379                                                            | 1.329                                                                  | 1.575                                                            | 1.470                                                            |
| <b><i>μ</i> [mm<sup>-1</sup>]</b>                        | 1.012                                                            | 0.849                                                            | 0.639                                                                  | 1.250                                                            | 1.028                                                            |
| <b>Collected reflections</b>                             | 37001                                                            | 13910                                                            | 37788                                                                  | 29139                                                            | 31372                                                            |
| <b>Unique reflections</b>                                | 6999                                                             | 4156                                                             | 11268                                                                  | 2929                                                             | 13077                                                            |
| <b>Observed reflections</b>                              | 6796                                                             | 3707                                                             | 9346                                                                   | 2815                                                             | 6040                                                             |
| <b><i>R</i><sub>int</sub></b>                            | 0.0231                                                           | 0.0228                                                           | 0.0306                                                                 | 0.0338                                                           | 0.0583                                                           |
| <b><i>R</i><sub>1</sub> (<i>I</i> &gt; 2σ(<i>I</i>))</b> | 0.0233                                                           | 0.0268                                                           | 0.0331                                                                 | 0.0243                                                           | 0.0581                                                           |
| <b><i>wR</i><sub>2</sub> (all data)</b>                  | 0.0580                                                           | 0.0687                                                           | 0.0827                                                                 | 0.0663                                                           | 0.1731                                                           |

<sup>S1</sup> N. Podjed, B. Modec, M. M. Alcaide and J. López-Serrano, *RSC Adv.*, 2020, **10**, 18200–18221.

The  $[\text{Zn}(\text{quin})_2(\text{pyro})]$  complex molecules of **3** feature a metal ion in a five-coordinate environment which consists of two *N,O*-bidentate chelating quinaldinate ions and a monodentate pyrrolidine bound *via* amine nitrogen. As shown by the  $\tau$  parameter of 0.04, the  $\text{N}_3\text{O}_2$  donor set defines vertices of a slightly distorted square pyramid. The quinaldinate-to-zinc(II) and the amine-to-zinc(II) bonds are comparable to the ones observed for  $[\text{Zn}(\text{quin})_2(\text{pipe})]$ , a monopiperidine complex which was found in  $[\text{Zn}(\text{quin})_2(\text{pipe})]\cdot\text{cis}-[\text{Zn}(\text{quin})_2(\text{pipe})_2]$ .<sup>S1</sup> The differences between the pair may be ascribed to crystallographic disorder of pyrrolidine ligand in **3**. Hydrogen bonds of the  $\text{NH}\cdots\text{COO}^-$  type with the length of 2.856(2) Å link the  $[\text{Zn}(\text{quin})_2(\text{pyro})]$  complex molecules into supramolecular layers. These layers stack along *c* axis.

**Figure S1.** ORTEP drawing of the  $[\text{Zn}(\text{quin})_2(\text{pyro})]$  complex molecule in **3**. The displacement ellipsoids are shown at the 50% probability level. Hydrogen atoms are omitted for clarity.

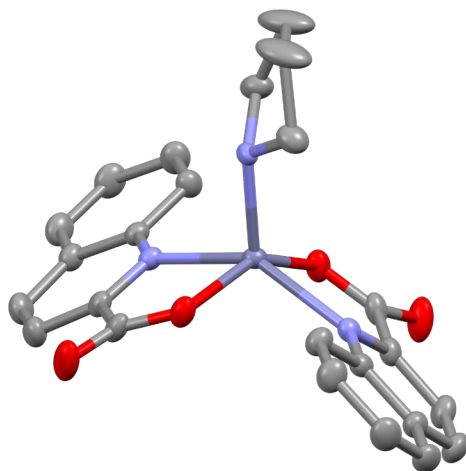

**Table S2.** Relevant geometric parameters [Å] of  $[\text{Zn}(\text{quin})_2(\text{pyro})]$  (**3**) as compared to a piperidine analogue.

| Compound                                                                                                          | Zn–N(amine) | Zn–N(quin <sup>-</sup> ) | Zn–O(quin <sup>-</sup> ) | $\tau$ |
|-------------------------------------------------------------------------------------------------------------------|-------------|--------------------------|--------------------------|--------|
| $[\text{Zn}(\text{quin})_2(\text{pyro})]$ ( <b>3</b> )                                                            | 2.0291(19)  | 2.2093(10)               | 1.9921(9)                | 0.04   |
| $[\text{Zn}(\text{quin})_2(\text{pipe})]\cdot\text{cis}-[\text{Zn}(\text{quin})_2(\text{pipe})_2]$ <sup>[a]</sup> | 2.0670(18)  | 2.1906(18), 2.1962(17)   | 1.9785(15), 1.9888(14)   | 0.35   |

<sup>[a]</sup> Previous work.<sup>S1</sup> The data pertain to the five-coordinate species.

<sup>S1</sup> N. Podjed, B. Modec, M. M. Alcaide and J. López-Serrano, *RSC Adv.*, 2020, **10**, 18200–18221.

**Figure S2.** Intermolecular interactions in  $[\text{Zn}(\text{quin})_2(\text{pyro})]$  (**3**). Section of a supramolecular layer, viewed along  $c$  axis.

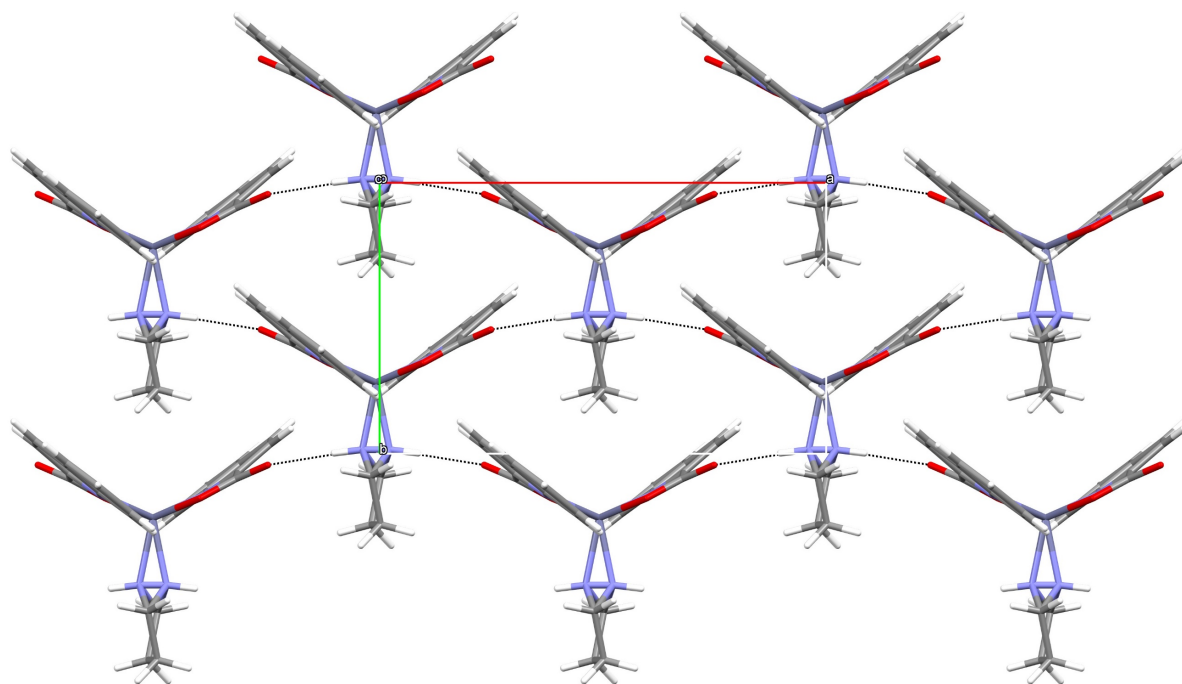

The  $[\text{Zn}(\text{quin})_2(\text{pyro})_2]$  complex molecules of **4** feature zinc(II) in a six-coordinate environment which consists of two *N,O*-bidentate chelating quinaldinate ions and two monodentate pyrrolidine ligands. The  $\text{N}_4\text{O}_2$  donor set defines vertices significantly longer than the ones found in a monoamine complex  $[\text{Zn}(\text{quin})_2(\text{pyro})]$  (**3**). As shown in Table S3, the coordination bonds in  $[\text{Zn}(\text{quin})_2(\text{pyro})_2]$  are similar to the ones in the piperidine analogue,  $[\text{Zn}(\text{quin})_2(\text{pipe})_2]$ .<sup>S1</sup> In **4**, hydrogen bonds of the  $\text{NH}\cdots\text{COO}^-$  type with the lengths of 2.921(4)–2.987(4) Å link complex molecules into supramolecular chains. The chains propagate along *b* axis.

**Figure S3.** ORTEP drawing of the  $[\text{Zn}(\text{quin})_2(\text{pyro})_2]$  complex molecule in **4**. The displacement ellipsoids are shown at the 50% probability level. Hydrogen atoms are omitted for clarity.

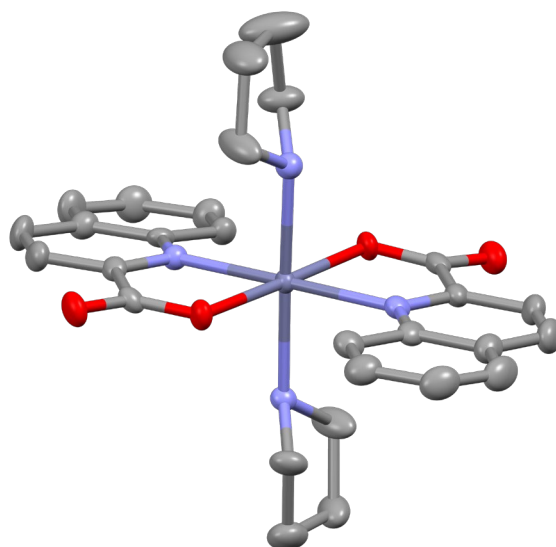

**Table S3.** Relevant geometric parameters [Å] of  $[\text{Zn}(\text{quin})_2(\text{pyro})_2]$  (**4**) as compared to a piperidine analogue.

| Compound                                                                              | Zn–N(amine)       | Zn–N(quin <sup>-</sup> ) | Zn–O(quin <sup>-</sup> ) |
|---------------------------------------------------------------------------------------|-------------------|--------------------------|--------------------------|
| $[\text{Zn}(\text{quin})_2(\text{pyro})_2]$ ( <b>4</b> )                              | 2.166(3)–2.189(3) | 2.240(3)–2.279(3)        | 2.060(2)–2.083(3)        |
| $[\text{Zn}(\text{quin})_2(\text{pipe})_2]\cdot 2\text{CH}_3\text{CN}$ <sup>[a]</sup> | 2.2168(15)        | 2.2520(14)               | 2.0526(12)               |

<sup>[a]</sup> Previous work.<sup>S1</sup>

<sup>S1</sup> N. Podjed, B. Modec, M. M. Alcaide and J. López-Serrano, *RSC Adv.*, 2020, **10**, 18200–18221.

**Figure S4.** Intermolecular interactions in  $[\text{Zn}(\text{quin})_2(\text{pyro})_2]$  (**4**). Section of a supramolecular chain.

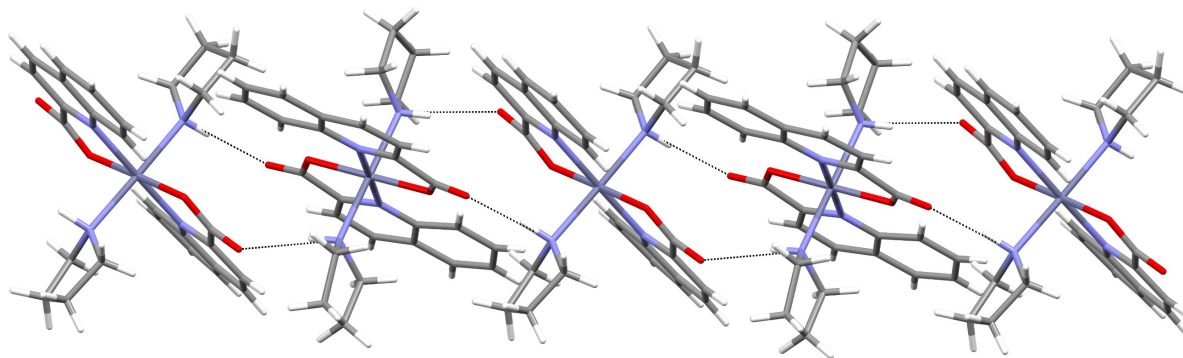

## 2. Intermolecular interactions and connectivity patterns in the structures of amidine compounds

**Table S4.** Hydrogen bond parameters in the structures of 6–12.

| Compound                                                                                 | Hydrogen bond                                         | Donor...acceptor distance [Å] |
|------------------------------------------------------------------------------------------|-------------------------------------------------------|-------------------------------|
| pipepropioamH[Zn(quin) <sub>3</sub> ] ( <b>6</b> )                                       | NH <sub>2</sub> <sup>+</sup> ...COO <sup>-</sup>      | 2.866(2)                      |
|                                                                                          | NH <sub>2</sub> <sup>+</sup> ...N(quin <sup>-</sup> ) | 2.938(2)                      |
| pyropropioamH[Zn(quin) <sub>3</sub> ] ( <b>7</b> )                                       | NH <sub>2</sub> <sup>+</sup> ...COO <sup>-</sup>      | 2.900(2)                      |
|                                                                                          | NH <sub>2</sub> <sup>+</sup> ...N(quin <sup>-</sup> ) | 2.991(2)                      |
| [Zn(quin) <sub>2</sub> (pipebenzoam)] ( <b>8a</b> )                                      | NH...COO <sup>-</sup>                                 | 2.898(2)                      |
|                                                                                          | NH...COO <sup>-</sup>                                 | 2.9114(18)                    |
| [Zn(quin) <sub>2</sub> (pipebenzoam)] ( <b>8b</b> )                                      | NH...COO <sup>-</sup>                                 | 2.941(3)                      |
| [Zn(quin) <sub>2</sub> (pyrobenzoam)] ( <b>9a</b> )                                      | NH...COO <sup>-</sup>                                 | 3.0016(19)                    |
| [Zn(quin) <sub>2</sub> (pyrobenzoam)] ( <b>9b</b> )                                      | NH...COO <sup>-</sup>                                 | 2.915(2)                      |
|                                                                                          | NH...COO <sup>-</sup>                                 | 2.970(2)                      |
| pyrobenzoamH[Zn(quin) <sub>3</sub> ] ( <b>11</b> )                                       | NH <sub>2</sub> <sup>+</sup> ...COO <sup>-</sup>      | 2.830(5)                      |
| pyrobenzoamH[Zn(quin) <sub>3</sub> ]·[Zn(quin) <sub>2</sub> (pyrobenzoam)] ( <b>12</b> ) | NH...COO <sup>-</sup>                                 | 2.950(3)                      |
|                                                                                          | NH <sub>2</sub> <sup>+</sup> ...COO <sup>-</sup>      | 2.831(4)                      |
|                                                                                          | NH <sub>2</sub> <sup>+</sup> ...COO <sup>-</sup>      | 2.955(4)                      |

**Figure S5.** Section of a supramolecular chain in pyrobenzoamH[Zn(quin)<sub>3</sub>] (**11**): the NH<sub>2</sub><sup>+</sup>...COO<sup>-</sup> and the NH<sub>2</sub><sup>+</sup>...N(quin<sup>-</sup>) contacts are 2.830(5) and 3.141(5) Å, respectively.

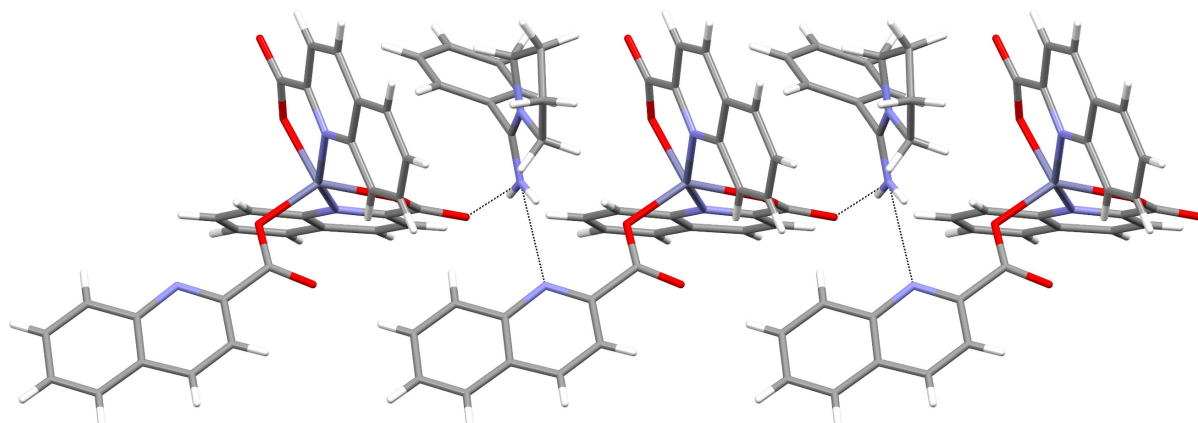



**Figure S6.** Supramolecular connectivity in pyrobenzoamH[Zn(quin)<sub>3</sub>] $\cdot$ [Zn(quin)<sub>2</sub>(pyrobenzoam)] (**12**): a short section of an infinite chain of ions (top) and a dimer of complex molecules (bottom).

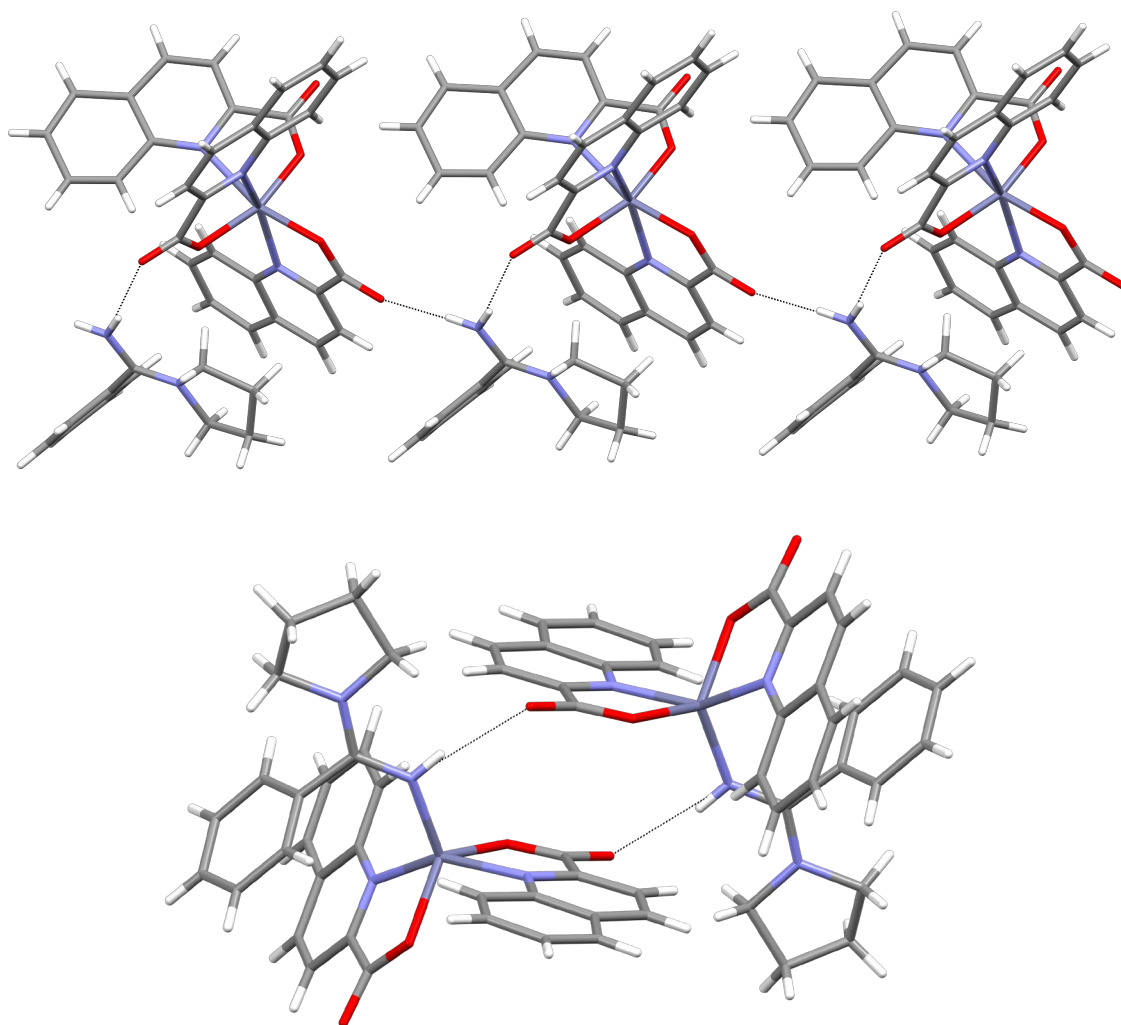

**Figure S7.** Packing in the structure of **12**. Layers of the  $[\text{Zn}(\text{quin})_2(\text{pyrobenzoam})]$  molecules, shown in grey colour, alternate with layers of the chains consisting of pyrobenzoamH<sup>+</sup> cations (coloured blue) and  $[\text{Zn}(\text{quin})_3]^-$  anions (coloured green). The supramolecular chains propagate along *a* axis. The view is along the chains.

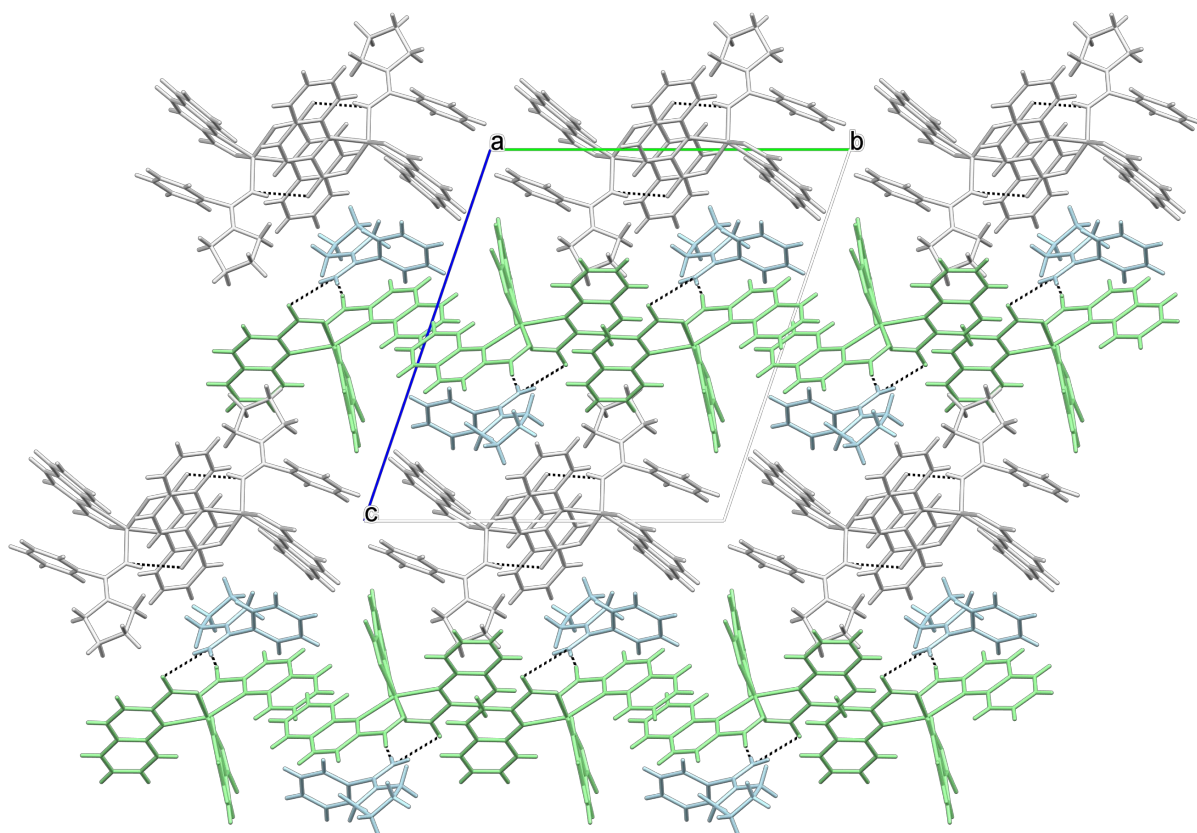

### 3. Additional remarks on the infrared spectra

Presence of the coordinated amines, *i.e.*, piperidine and pyrrolidine, in compounds **1·CH<sub>3</sub>CH<sub>2</sub>CN–3** is corroborated by the stretching vibrations of the N–H and C–H bonds. The N–H stretching absorptions appear in the 3231–3126 cm<sup>-1</sup> spectral region, whereas the C–H stretching bands occur in the 2960–2855 cm<sup>-1</sup> region. With the amines being secondary amines, one ν(N–H) band is observed. The respective bands are of weak to medium intensity.

**Table S5.** Characteristic bands [cm<sup>-1</sup>] in the spectra of Zn(II) complexes with amines.

| Compound                                                                                                                    | ν(N–H) | ν(C–H)            |
|-----------------------------------------------------------------------------------------------------------------------------|--------|-------------------|
| [Zn(quin) <sub>2</sub> (pipe)]·CH <sub>3</sub> CH <sub>2</sub> CN ( <b>1·CH<sub>3</sub>CH<sub>2</sub>CN</b> )               | 3126   | bands around 2937 |
| [Zn(quin) <sub>2</sub> (pipe) <sub>2</sub> ]·CH <sub>3</sub> CH <sub>2</sub> CN ( <b>2·CH<sub>3</sub>CH<sub>2</sub>CN</b> ) | 3221   | 2931, 2854        |
| [Zn(quin) <sub>2</sub> (pipe) <sub>2</sub> ]·2.5PhCN ( <b>2·2.5PhCN</b> )                                                   | 3231   | 2932, 2855        |
| [Zn(quin) <sub>2</sub> (pyro)] ( <b>3</b> )                                                                                 | 3171   | bands around 2956 |
| [Zn(quin) <sub>2</sub> (pyro) <sub>2</sub> ] ( <b>4</b> ) <sup>[a]</sup>                                                    | 3188   | 2953, 2873        |

<sup>[a]</sup> Previous work.<sup>S1</sup>

Nitrile solvent molecules are characterized by the C≡N stretching frequency which occurs according to the literature data for the aliphatic nitriles at 2260–2240 cm<sup>-1</sup> and for benzonitriles at 2240–2220 cm<sup>-1</sup>.<sup>S2</sup> Accordingly, [Zn(quin)<sub>2</sub>(pipe)]·CH<sub>3</sub>CH<sub>2</sub>CN (**1·CH<sub>3</sub>CH<sub>2</sub>CN**) shows a band at 2244 cm<sup>-1</sup>, whereas [Zn(quin)<sub>2</sub>(pipe)<sub>2</sub>]·2.5PhCN (**2·2.5PhCN**) absorbs at 2226 cm<sup>-1</sup>.

<sup>S1</sup> N. Podjed, B. Modec, M. M. Alcaide and J. López-Serrano, *RSC Adv.*, 2020, **10**, 18200–18221.

<sup>S2</sup> N. B. Colthup, L. H. Daly and S. E. Wiberley, *Introduction to Infrared and Raman Spectroscopy*, Academic Press, San Diego, CA, 3rd. edn., 1990.

Figure S8. Infrared spectrum of  $[\text{Zn}(\text{quin})_2(\text{pipe})] \cdot \text{CH}_3\text{CH}_2\text{CN}$  ( $\mathbf{1} \cdot \text{CH}_3\text{CH}_2\text{CN}$ ).

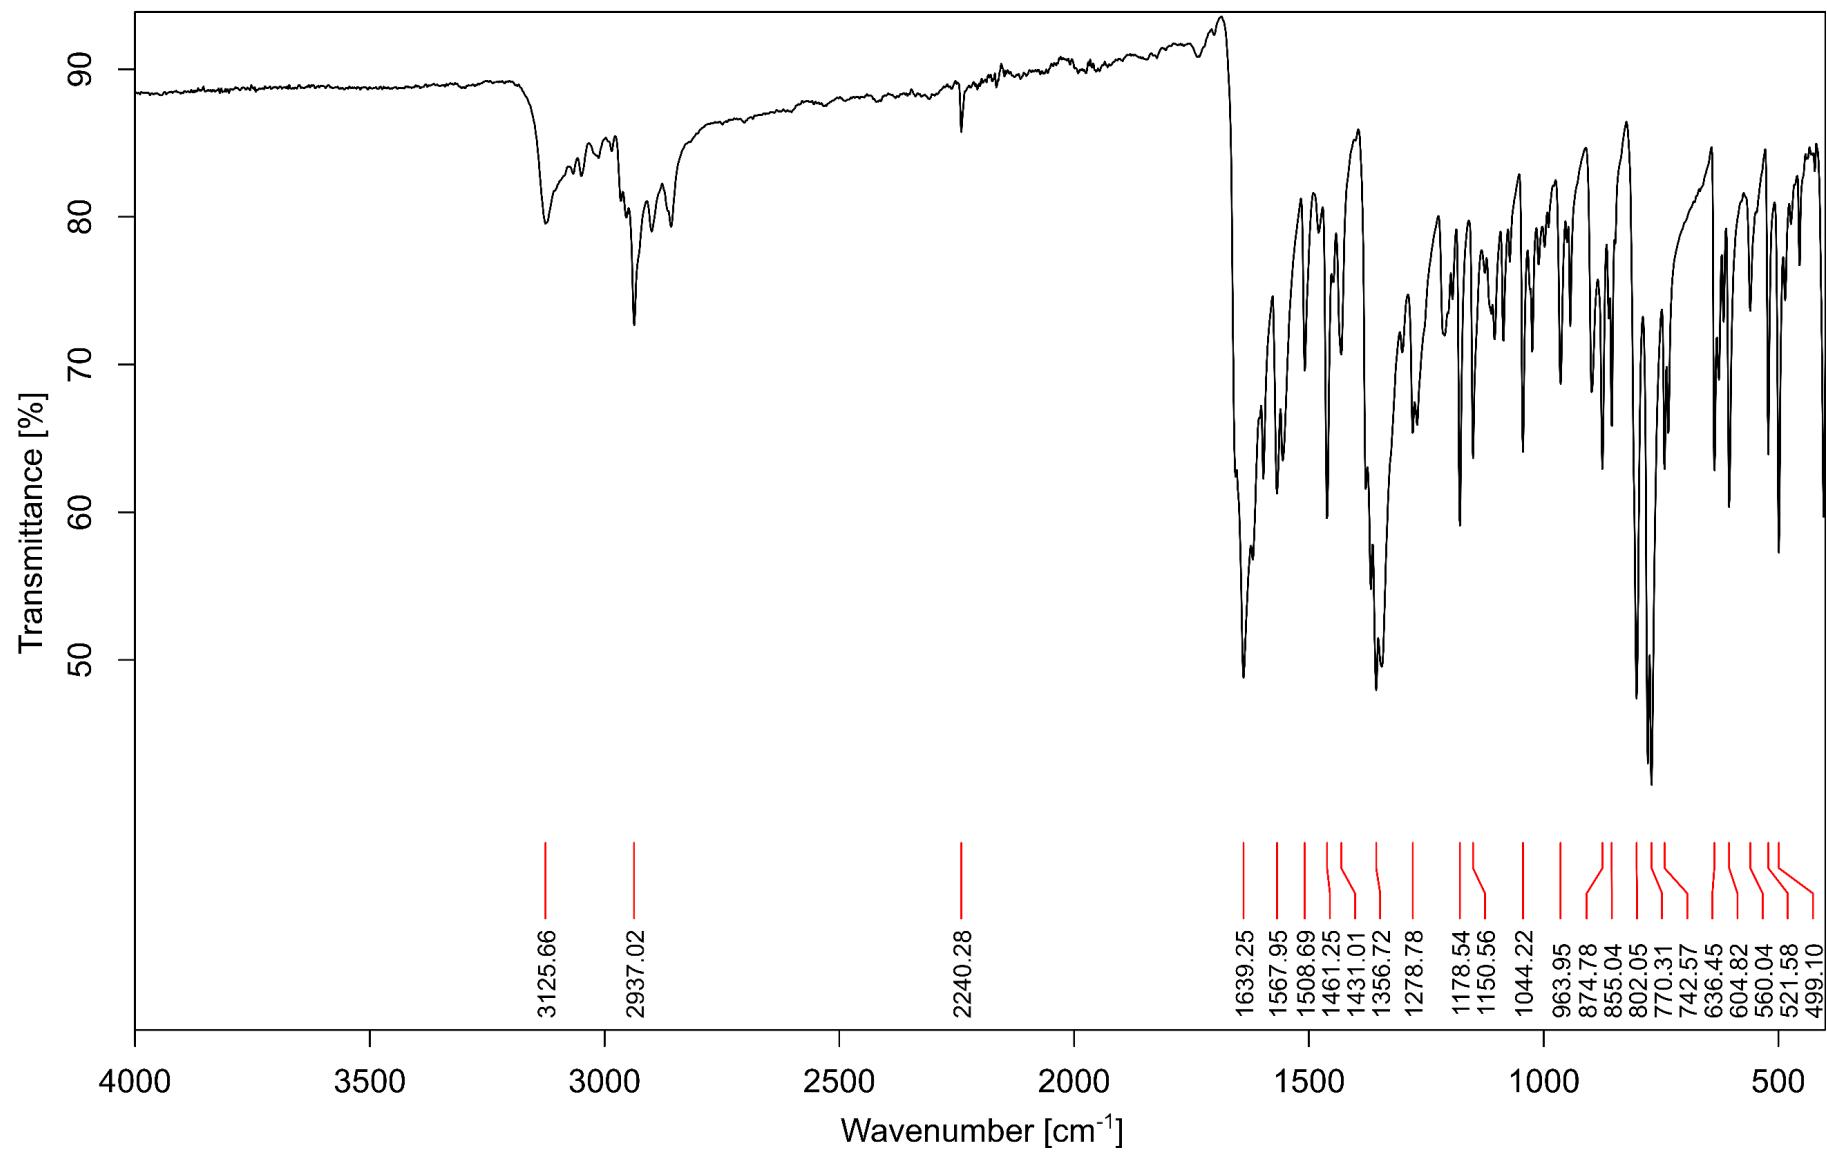

Figure S9. Infrared spectrum of  $[\text{Zn}(\text{quin})_2(\text{pipe})_2] \cdot \text{CH}_3\text{CH}_2\text{CN}$  ( $2 \cdot \text{CH}_3\text{CH}_2\text{CN}$ ).

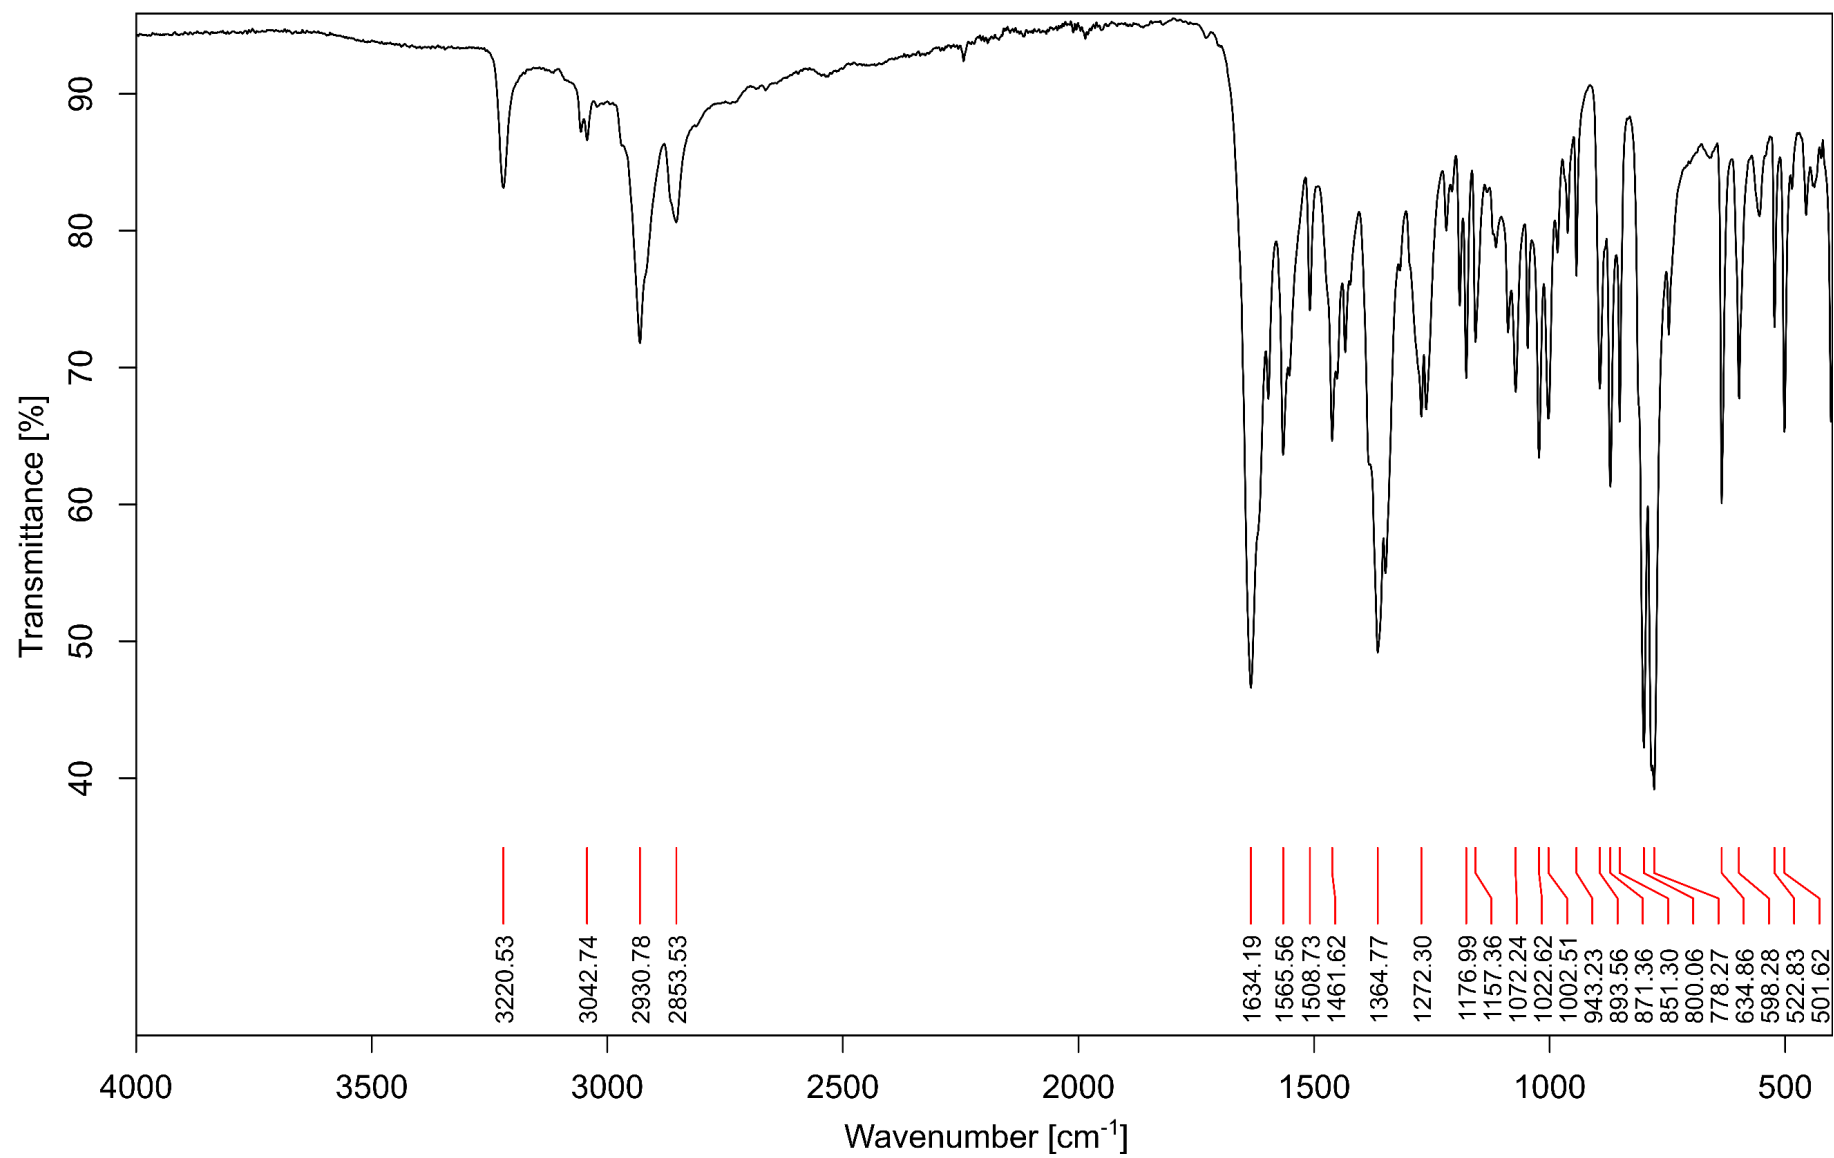

**Figure S10.** Infrared spectrum of  $[\text{Zn}(\text{quin})_2(\text{pipe})_2] \cdot 2.5\text{PhCN}$  (**2·2.5PhCN**).

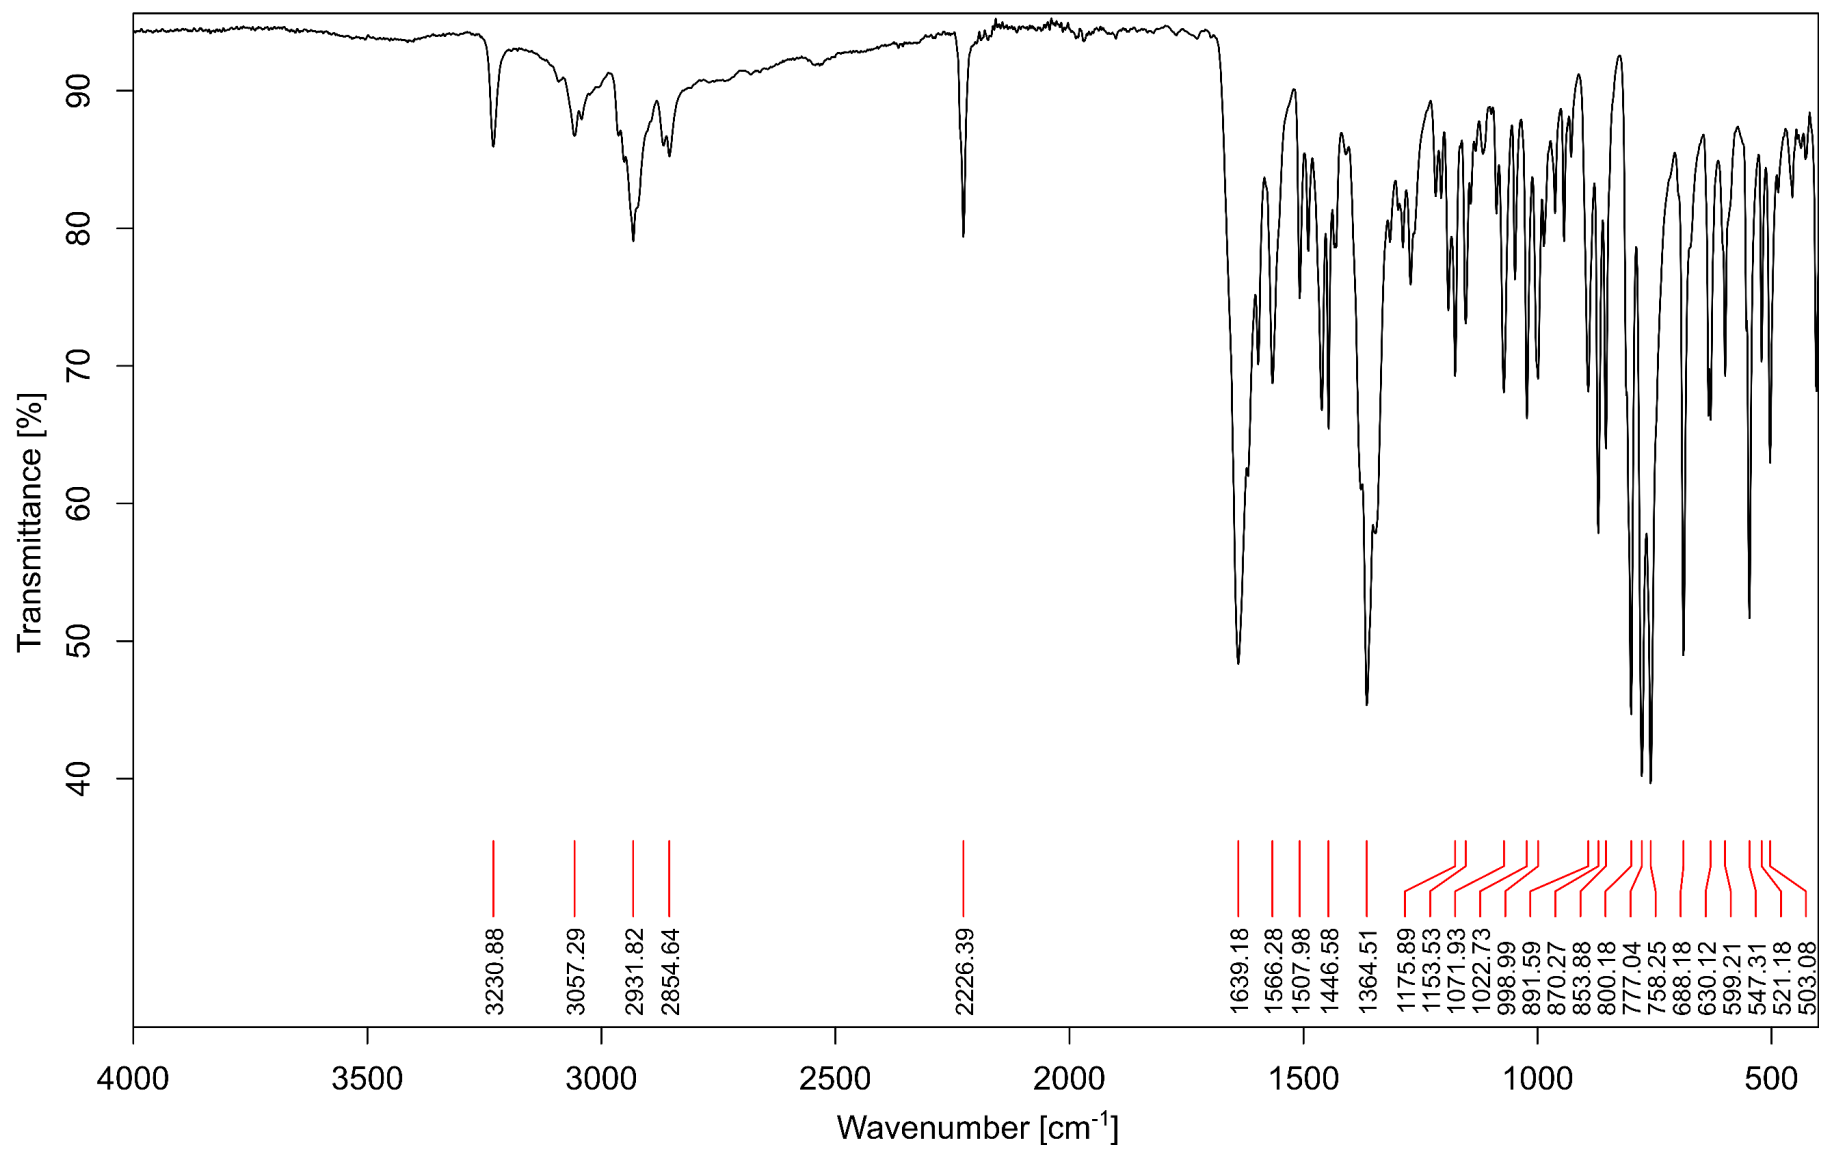

Figure S11. Infrared spectrum of [Zn(quin)<sub>2</sub>(pyro)] (3).

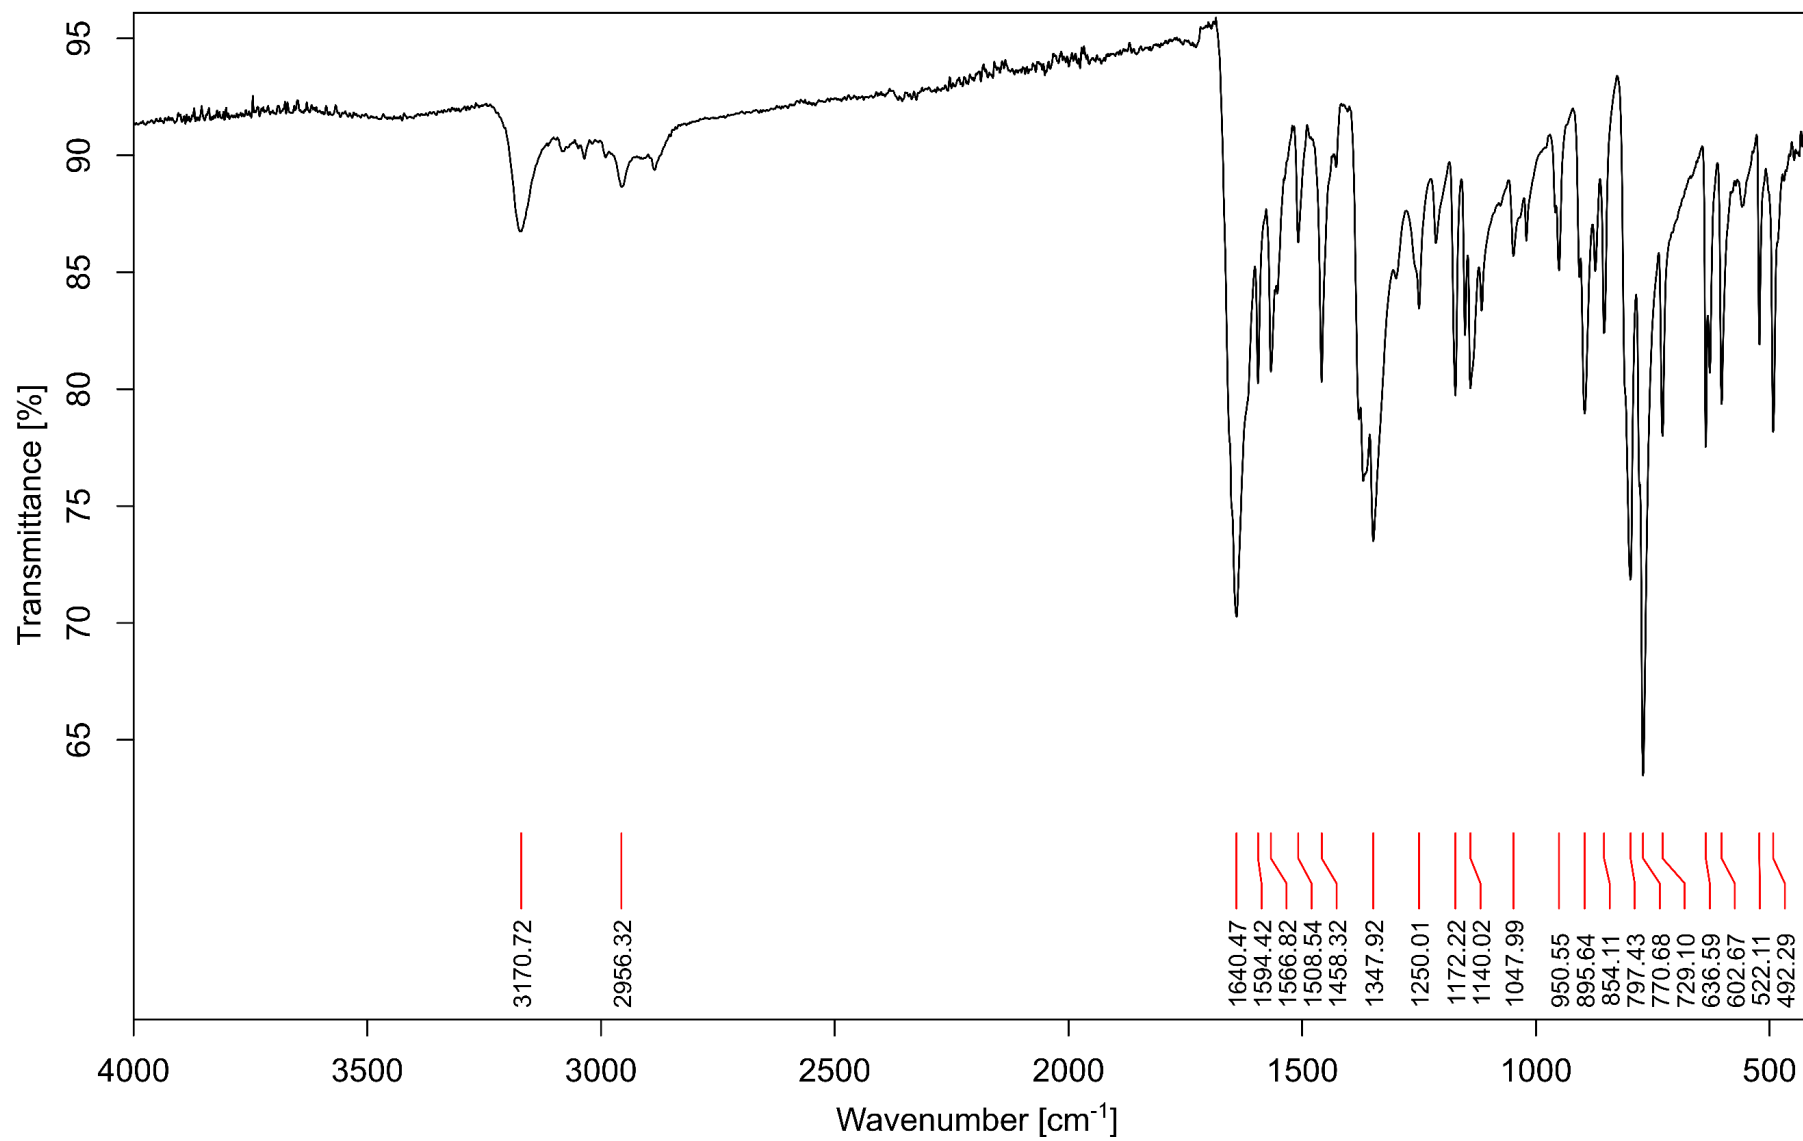

Figure S12. Infrared spectrum of [Zn(quin)<sub>2</sub>(pipepropioam)] (5).

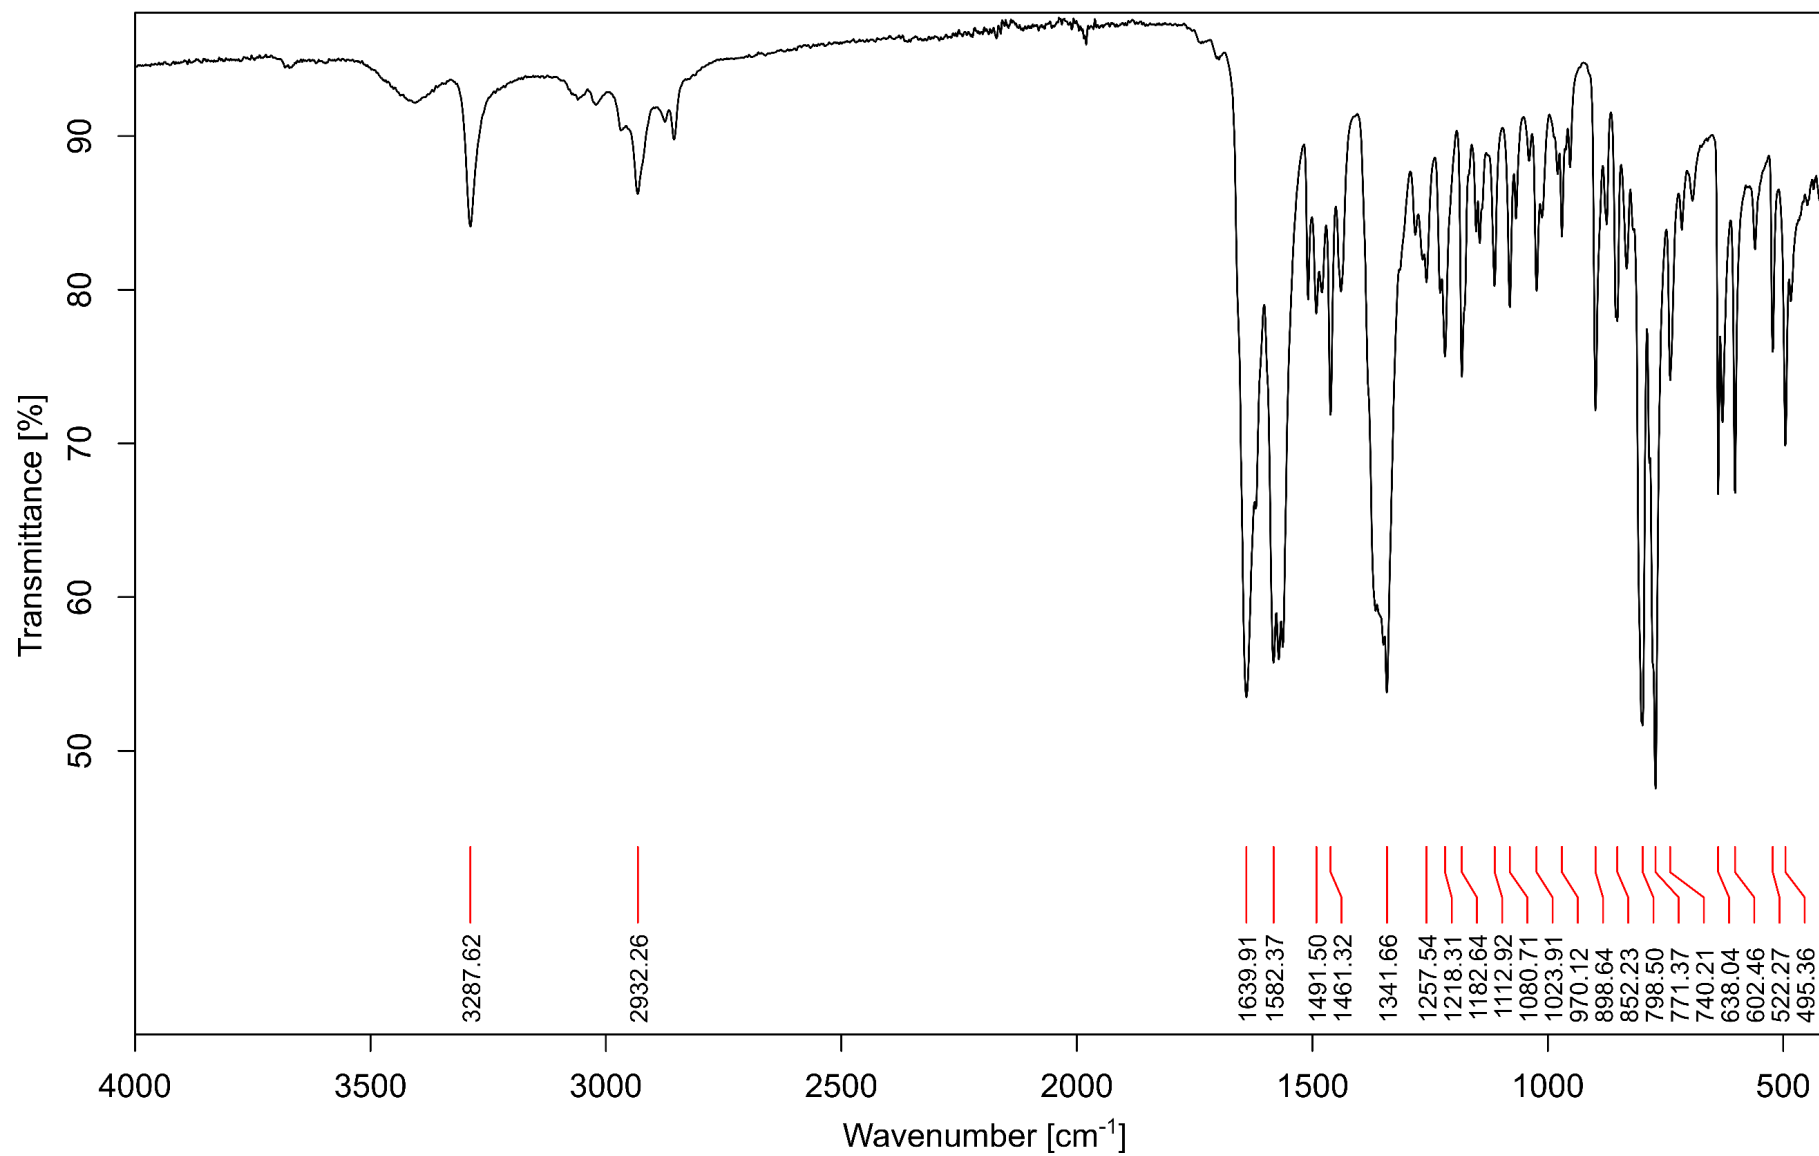



Figure S13. Infrared spectrum of pipepropioamH[Zn(quin)<sub>3</sub>] (6).

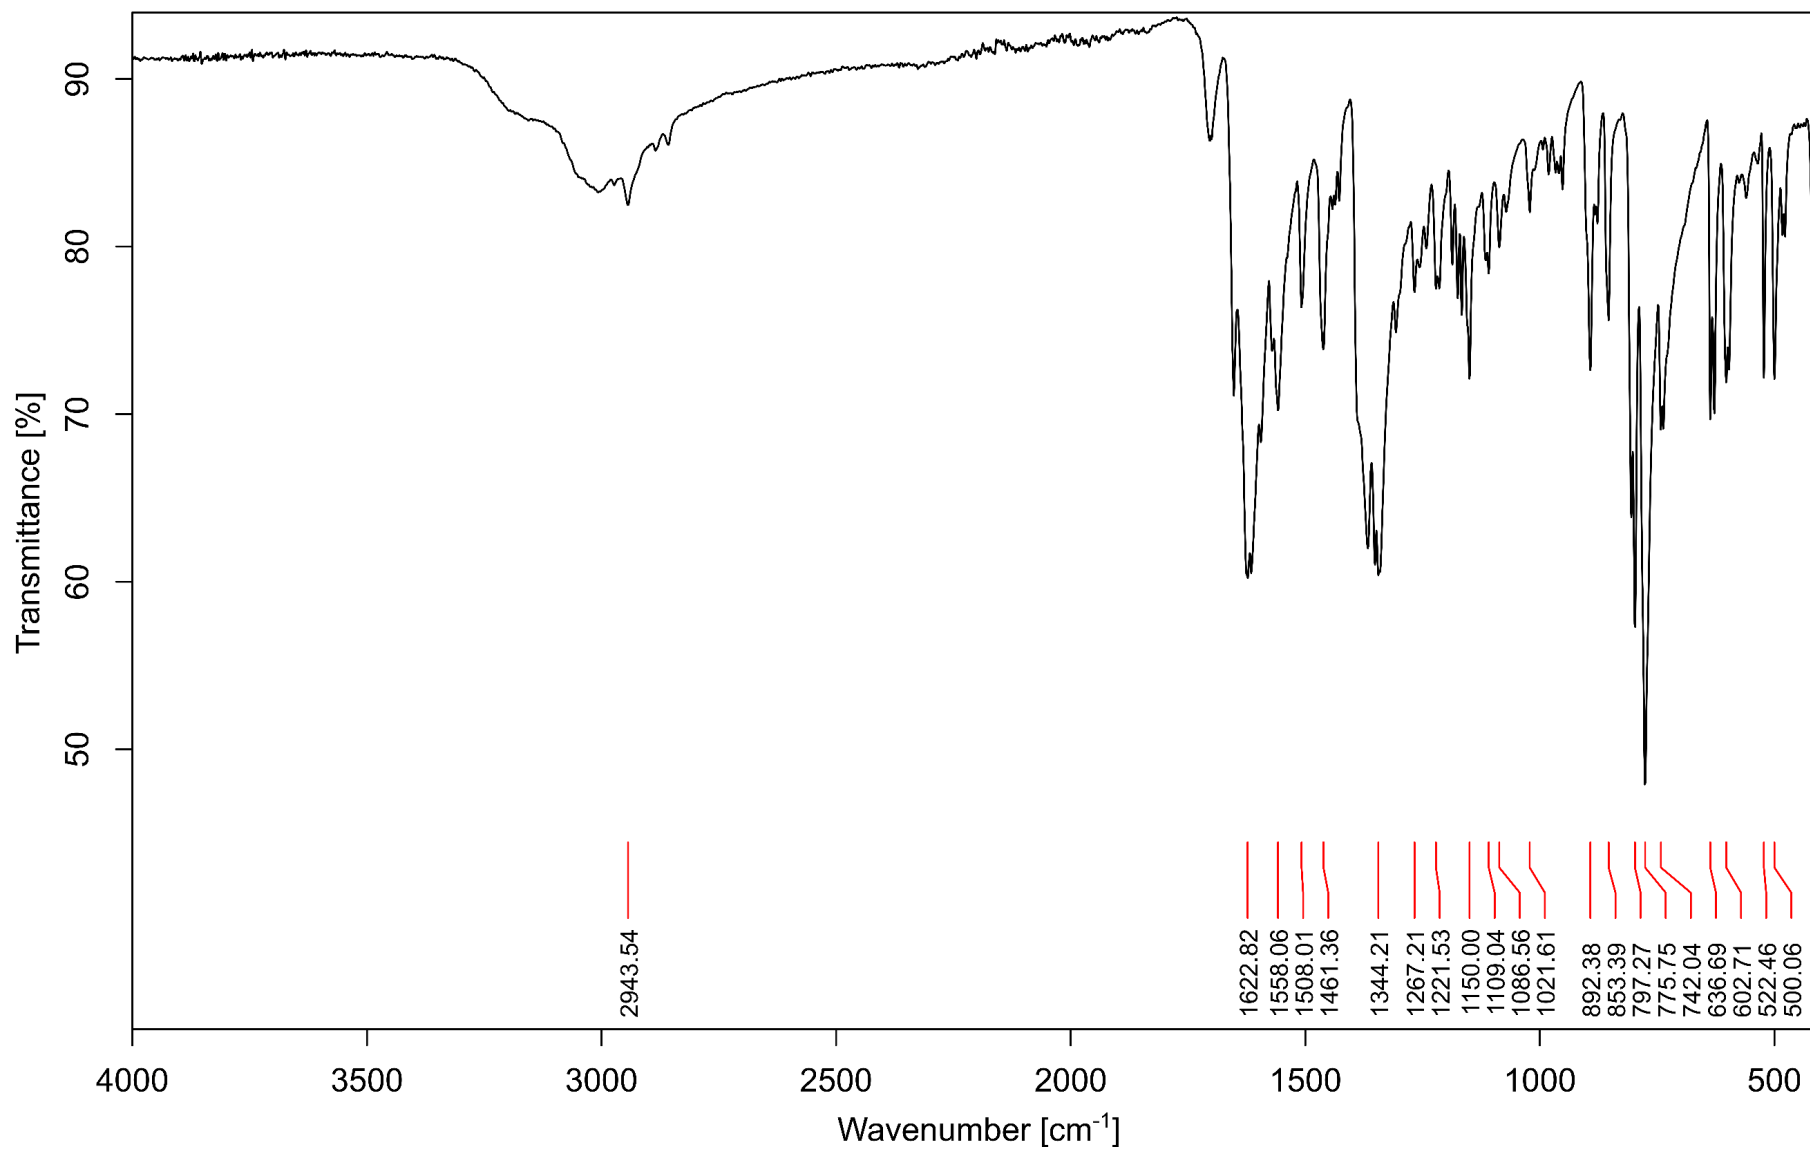

Figure S14. Infrared spectrum of pyropropioamH[Zn(quin)<sub>3</sub>] (7).

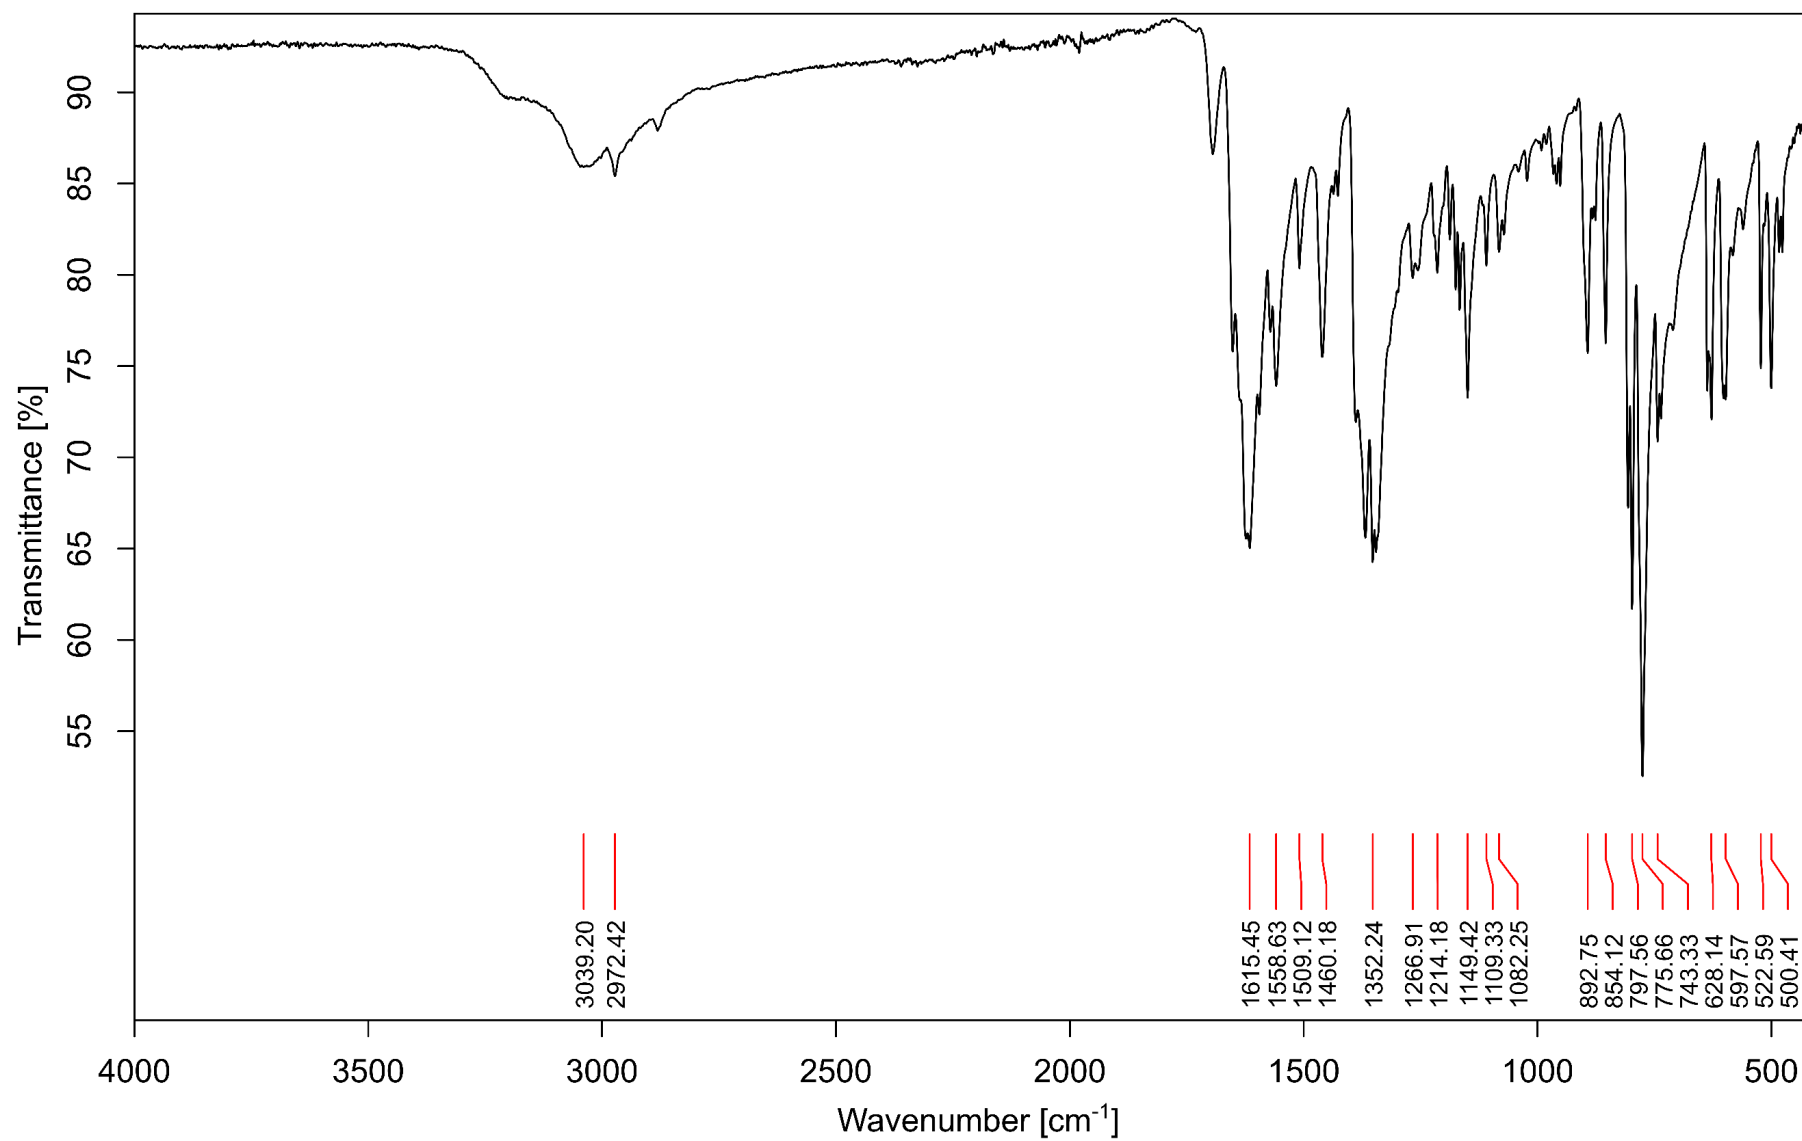

Figure S15. Infrared spectrum of [Zn(quin)<sub>2</sub>(pipebenzoam)] (8).

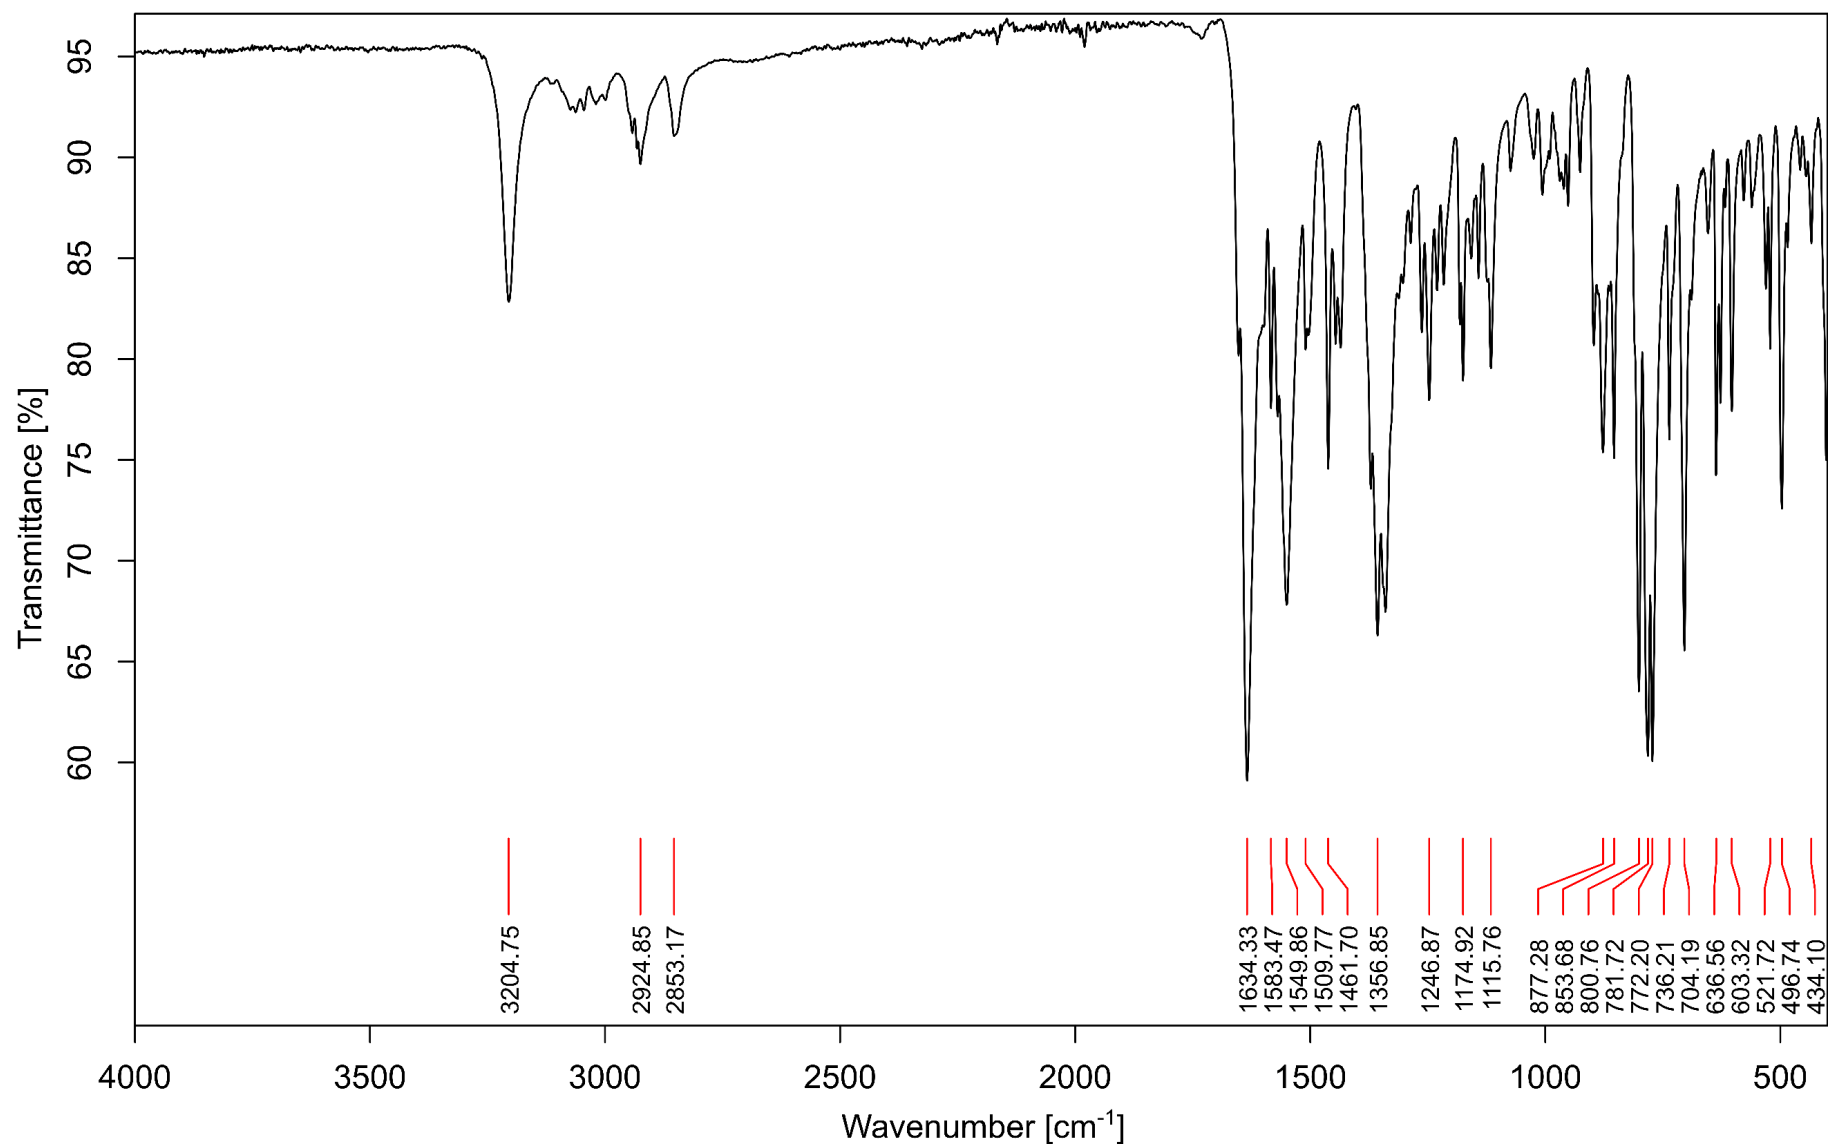

Figure S16. Infrared spectrum of [Zn(quin)<sub>2</sub>(pyrobenzoam)] (9).

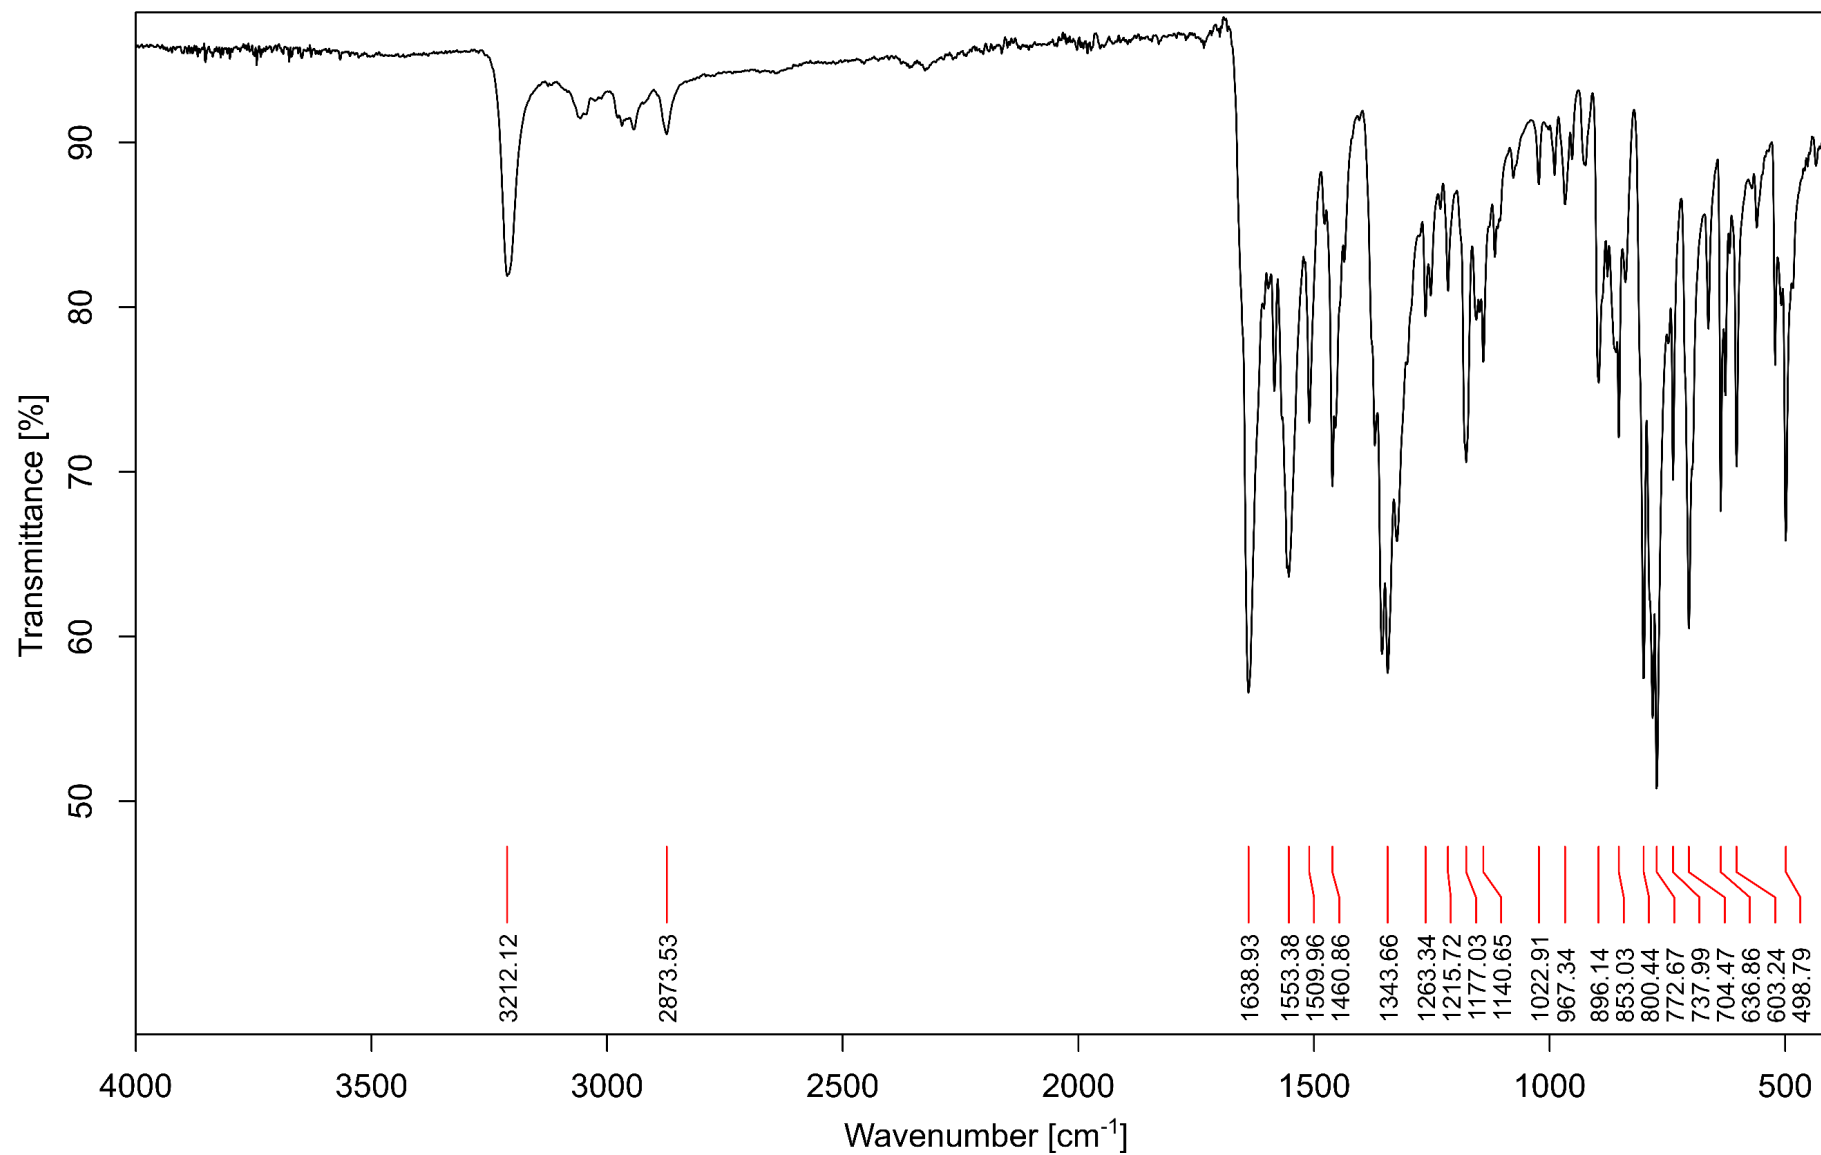

Figure S17. Infrared spectrum of pipebenzoamH[Zn(quin)<sub>3</sub>] (10).

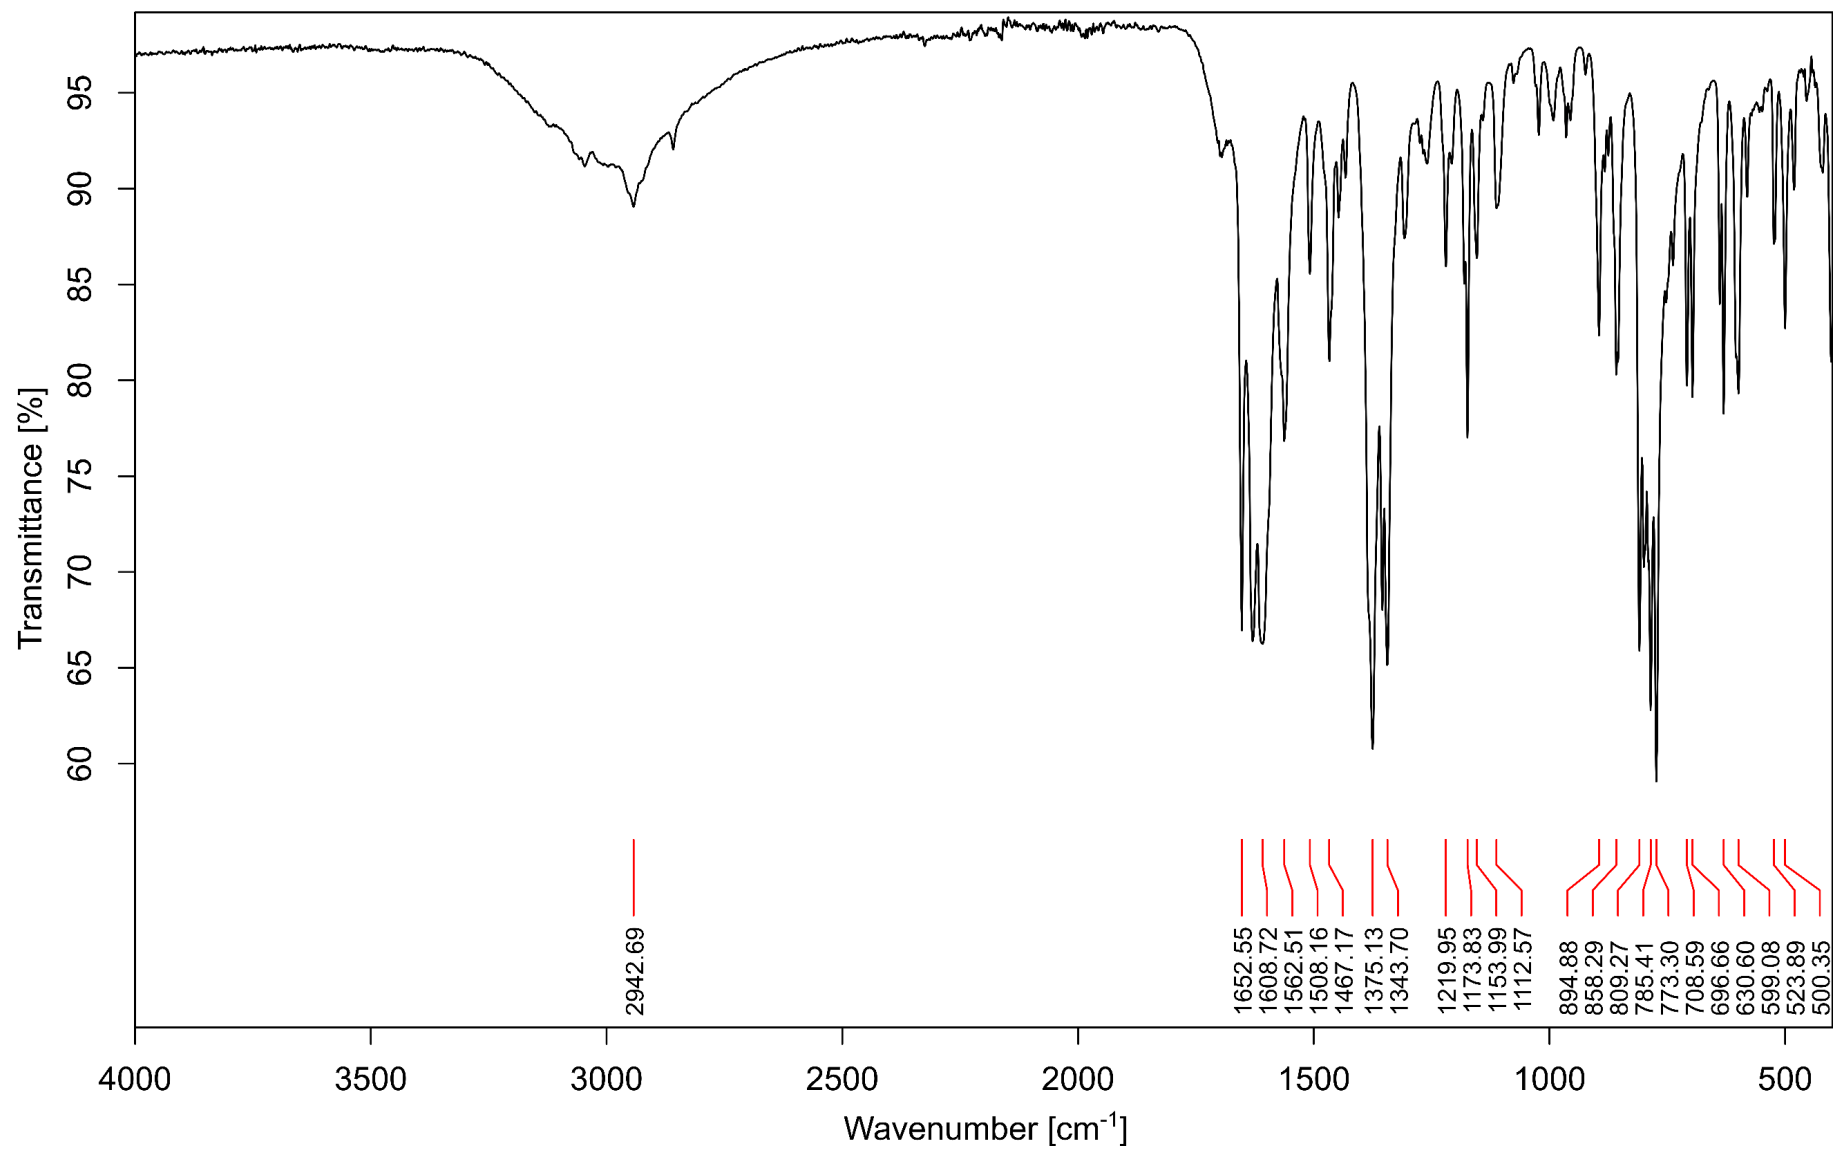

Figure S18. Infrared spectrum of pyrobenzoamH[Zn(quin)<sub>3</sub>] (**11**).

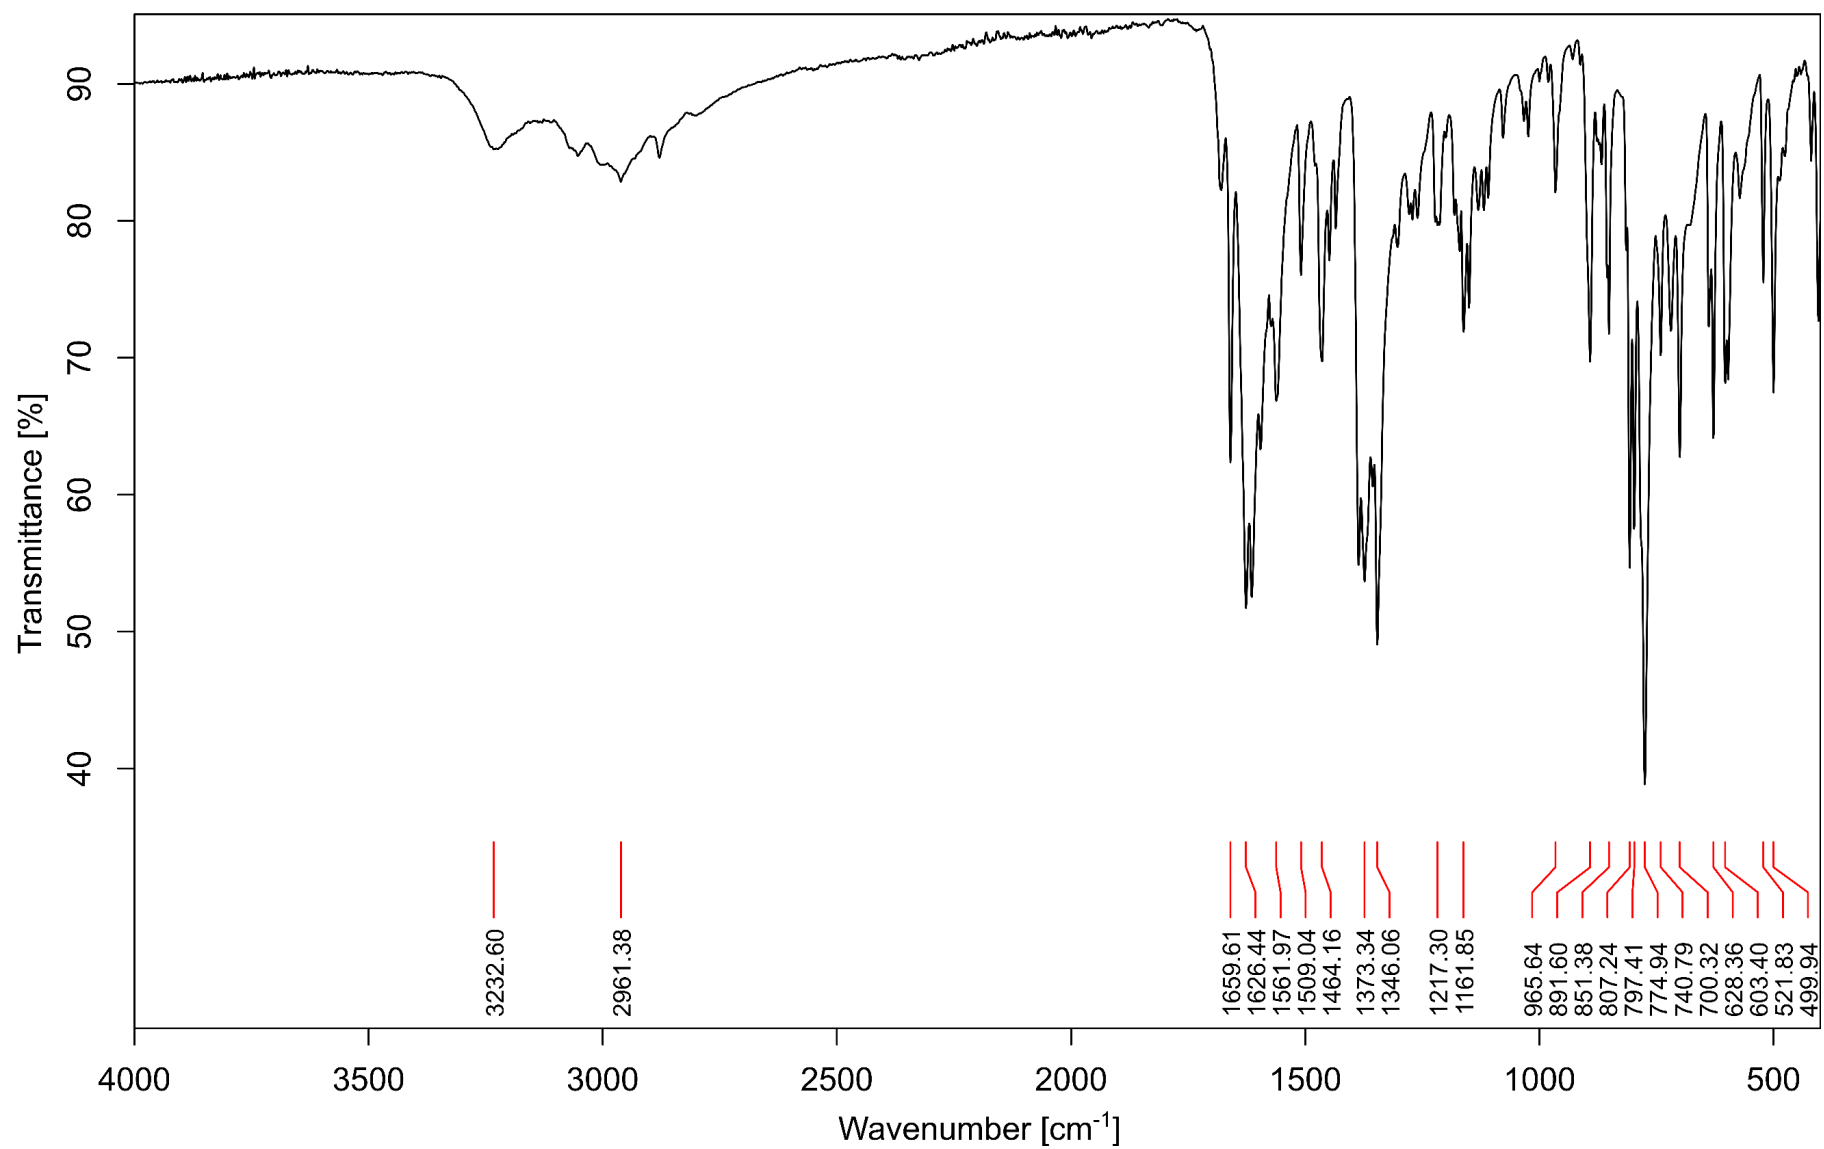

Figure S19. Infrared spectrum of pyrobenzoamH[Zn(quin)<sub>3</sub>]·[Zn(quin)<sub>2</sub>(pyrobenzoam)] (12).

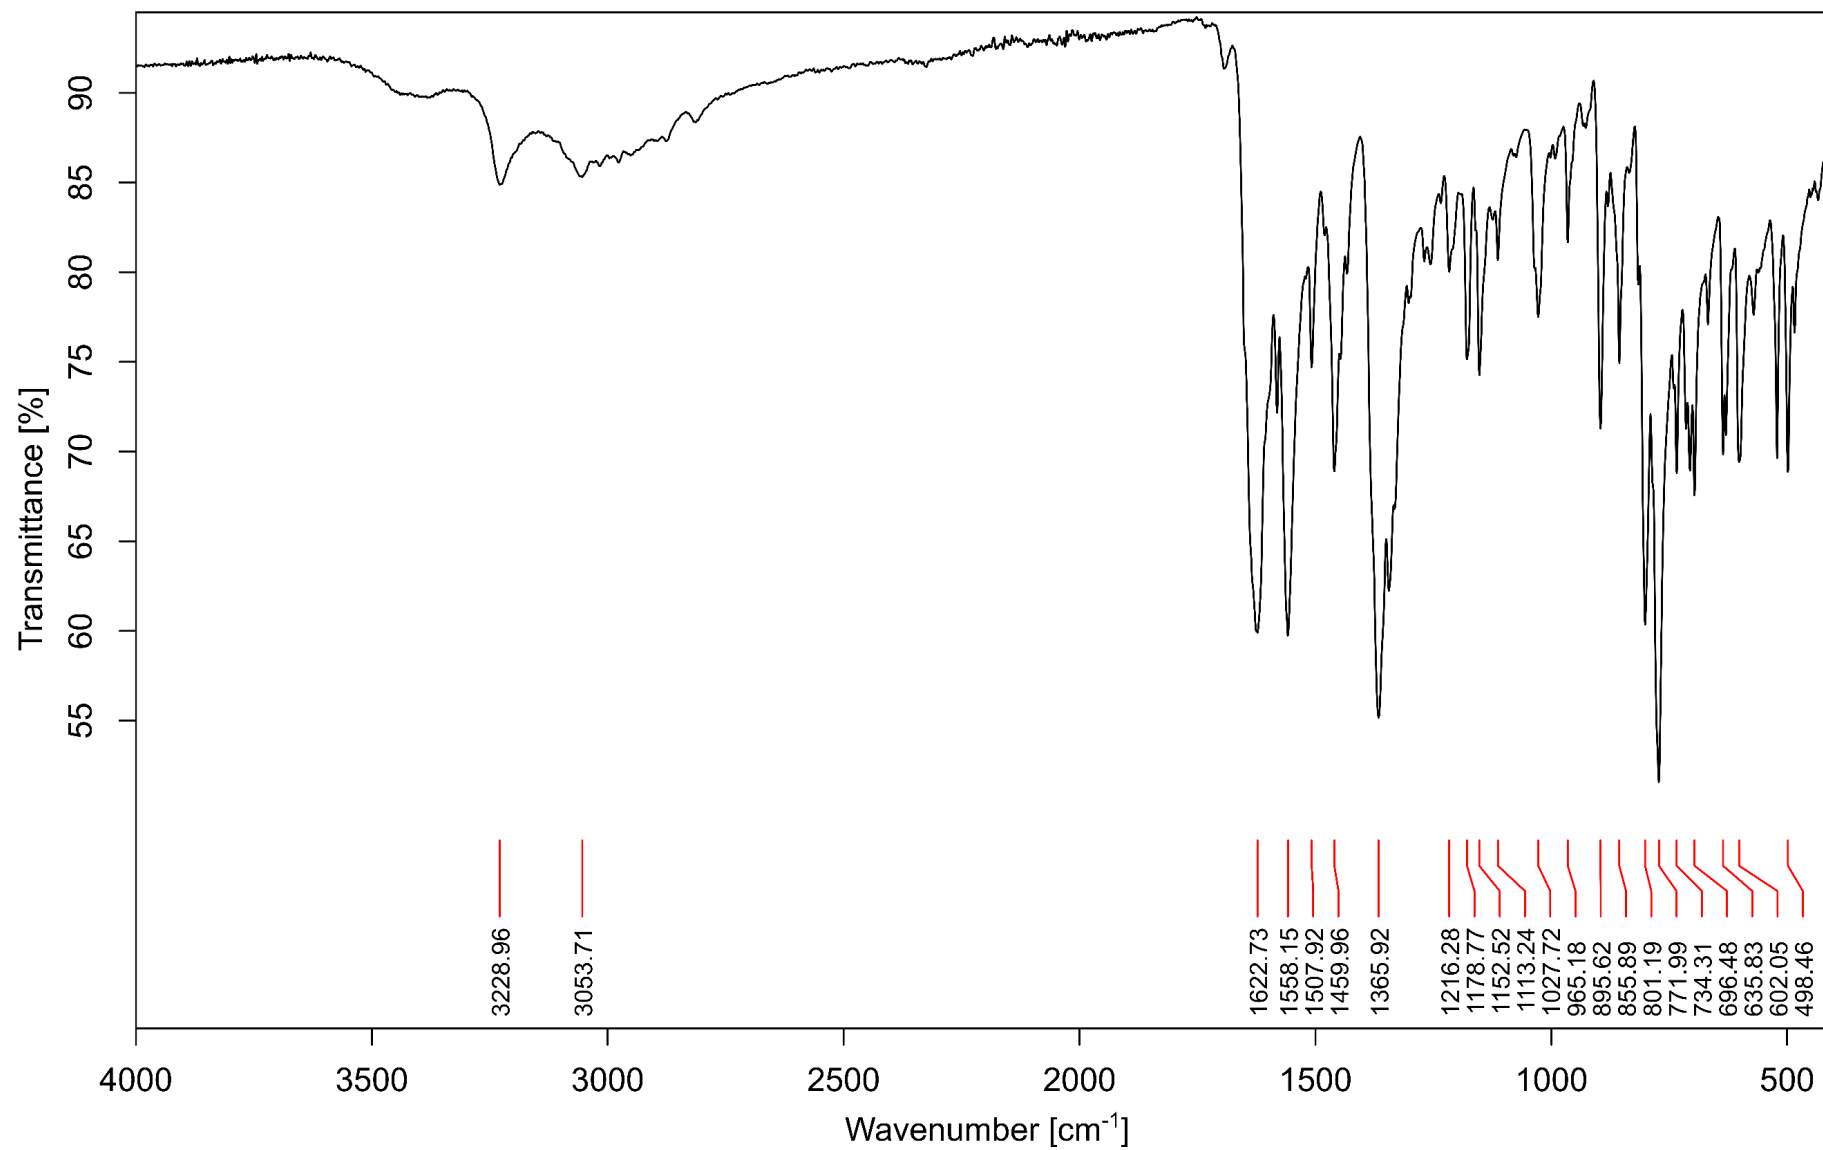

## 5. $^1\text{H}$ and $^{13}\text{C}$ NMR spectroscopy

Figure S20.  $^1\text{H}$  NMR spectrum of  $[\text{Zn}(\text{quin})_2(\text{pipe})]\cdot\text{CH}_3\text{CH}_2\text{CN}$  (**1**· $\text{CH}_3\text{CH}_2\text{CN}$ ) in  $\text{DMSO}-d_6$ .

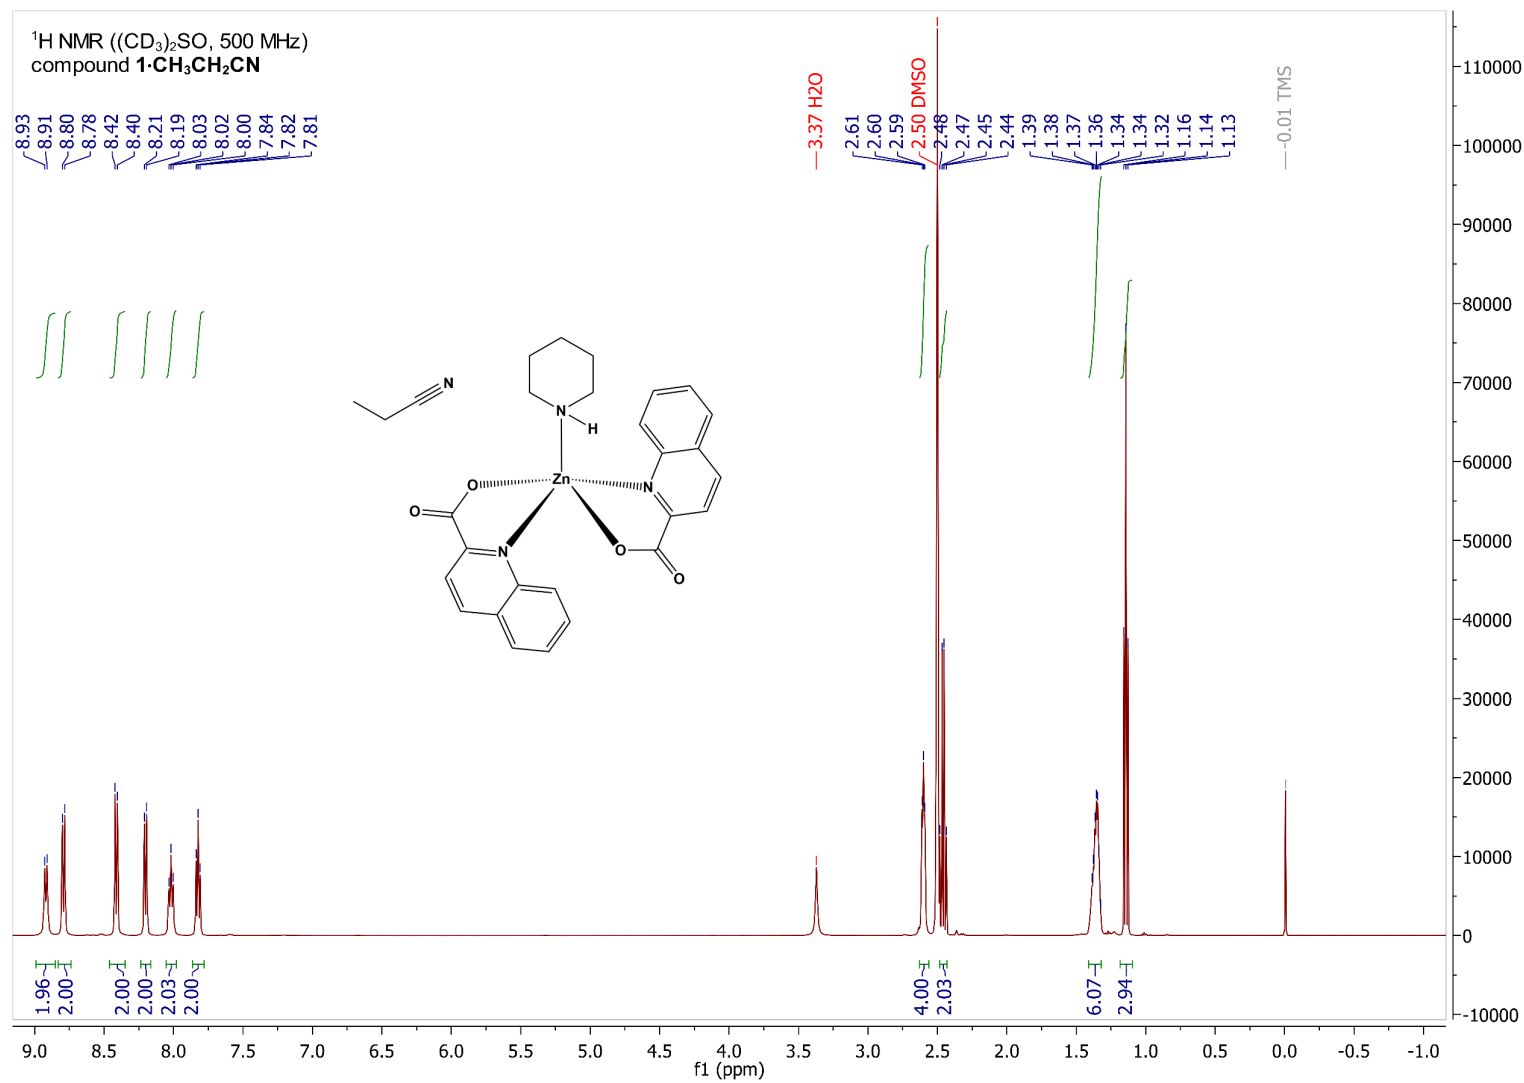



Figure S21.  $^1\text{H}$  NMR spectrum of  $[\text{Zn}(\text{quin})_2(\text{pyro})]$  (**3**) in  $\text{DMSO-}d_6$ .

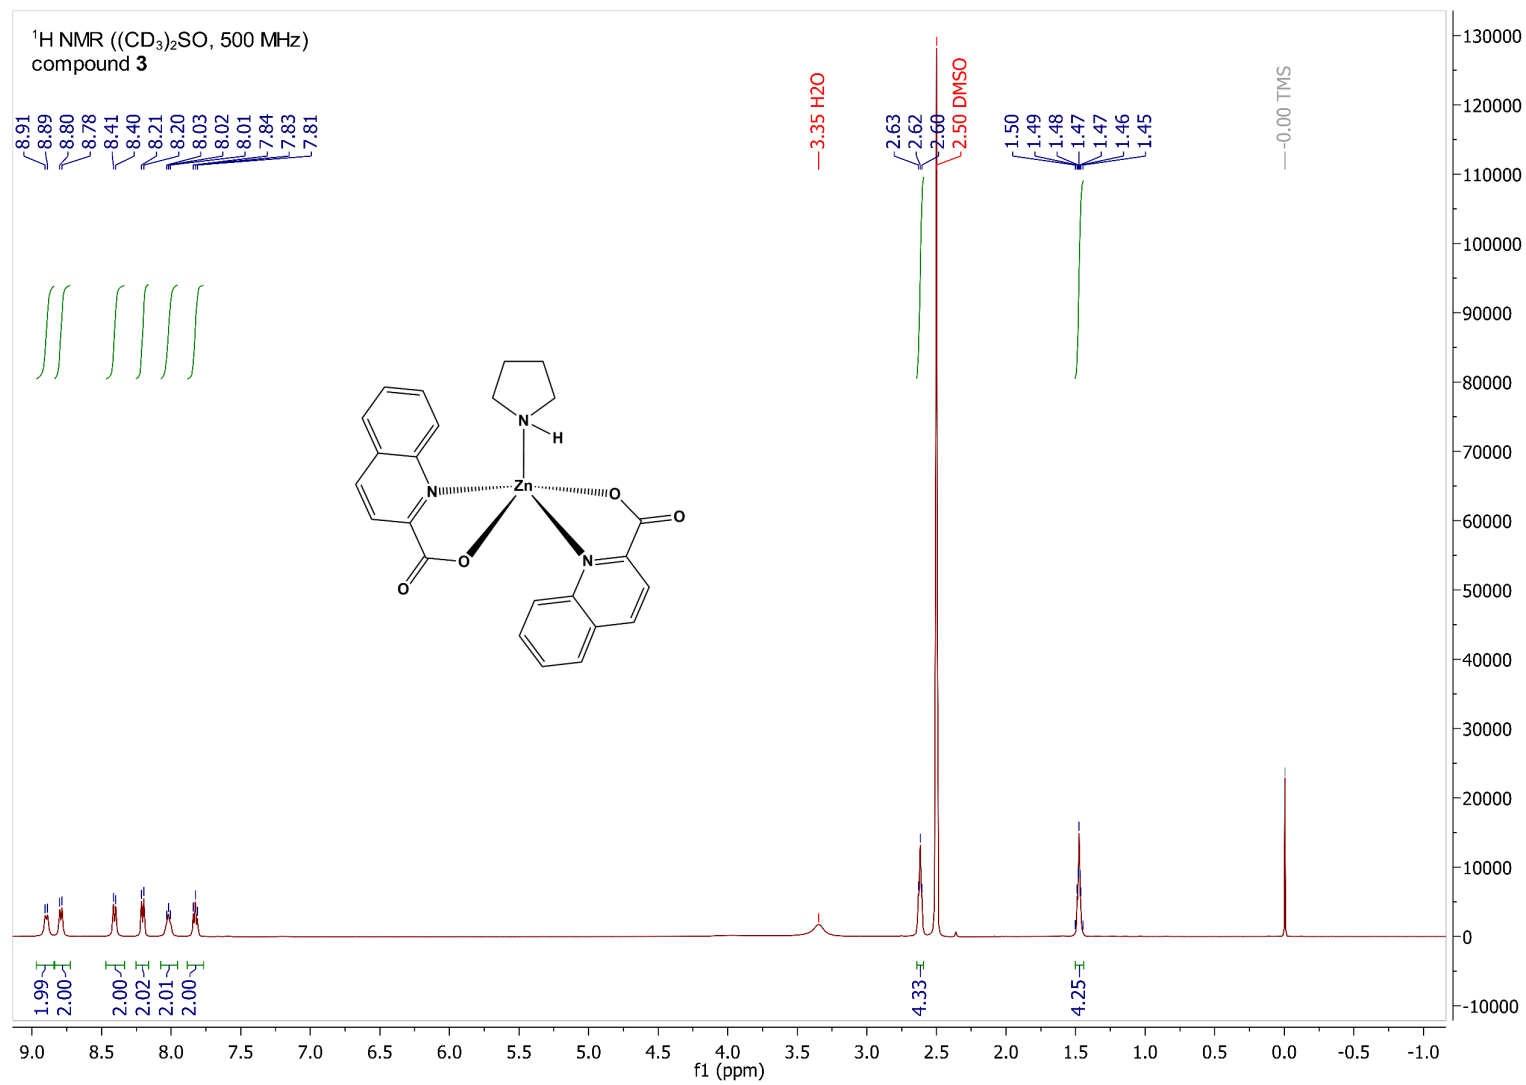

**Figure S22.**  $^1\text{H}$  NMR spectrum of  $[\text{Zn}(\text{quin})_2(\text{pipepropioam})]$  (**5**) in  $\text{DMSO-}d_6$  with the addition of trifluoroacetic acid.

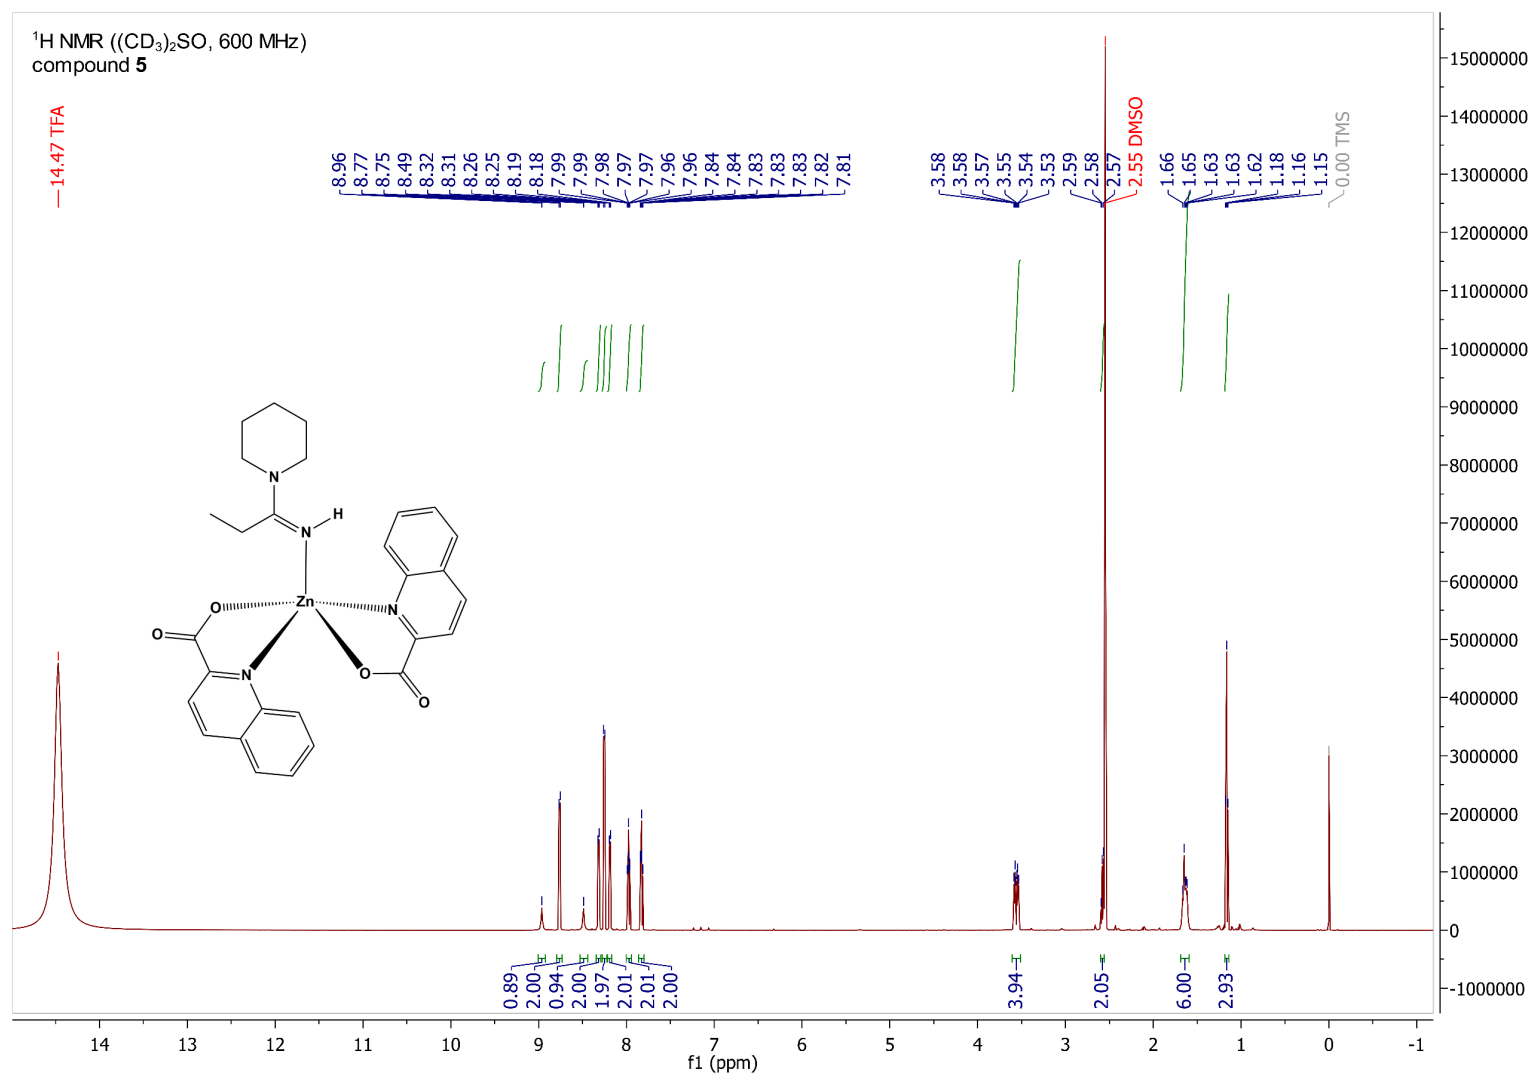

**Figure S23.**  $^1\text{H}$  NMR spectrum of pipepropioamH[Zn(quin) $_3$ ] (**6**) in DMSO- $d_6$ .

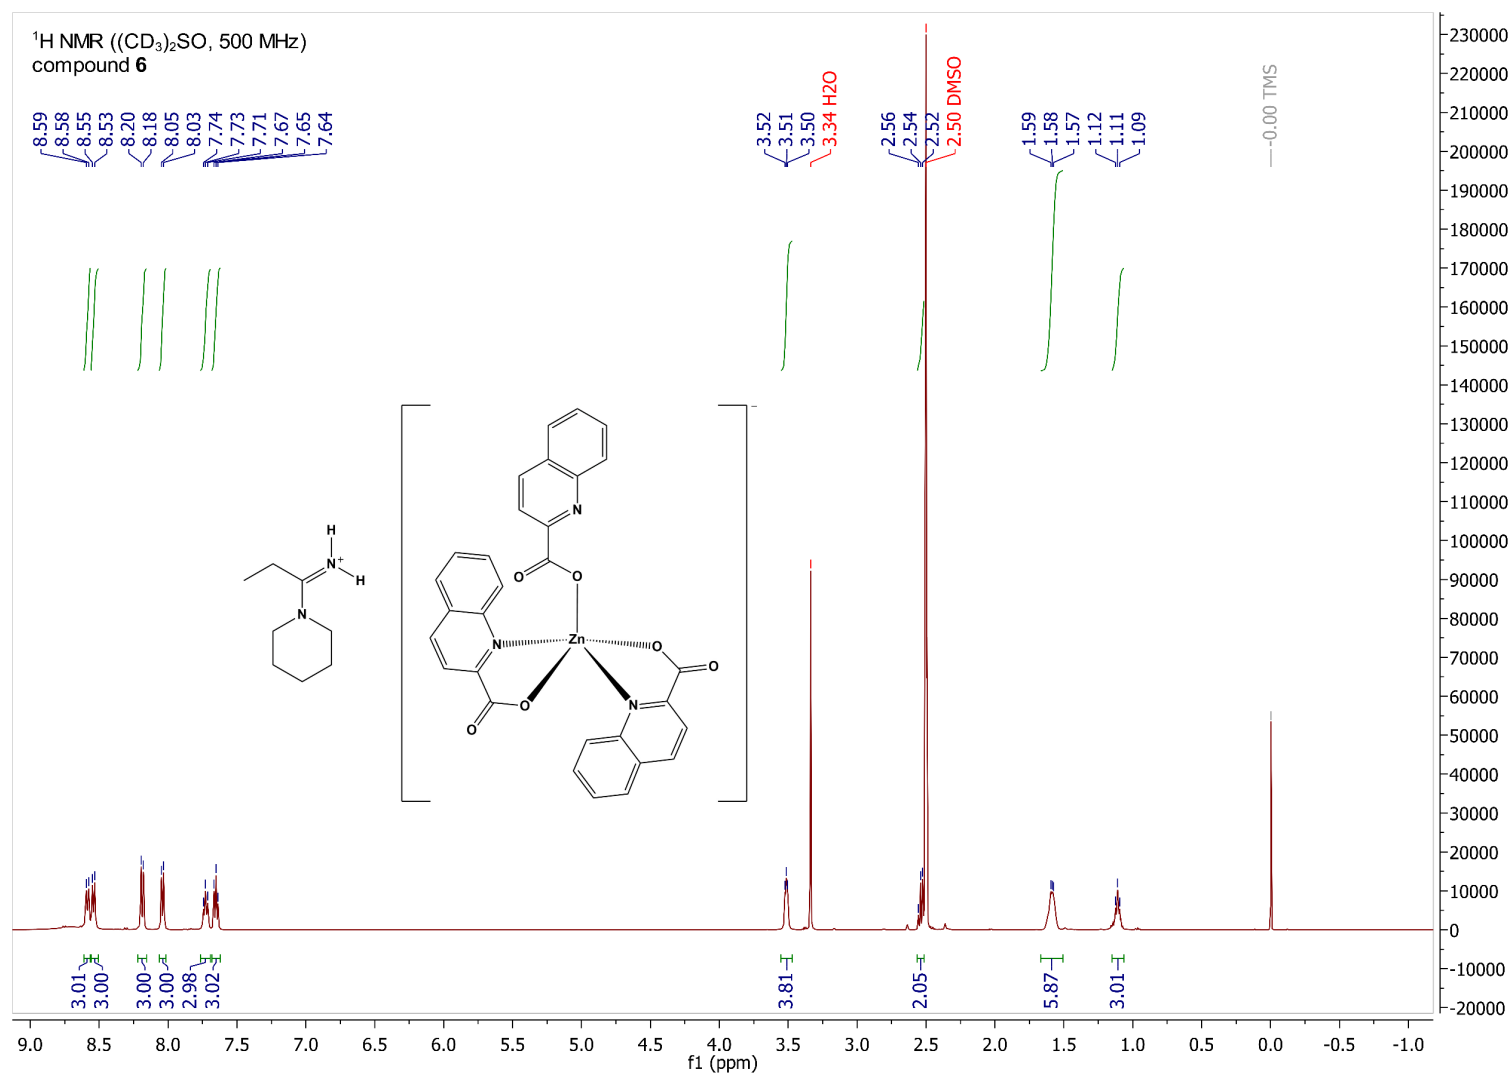

**Figure S24.**  $^{13}\text{C}$  NMR spectrum of pipepropioamH[Zn(quin) $_3$ ] (**6**) in DMSO- $d_6$ .

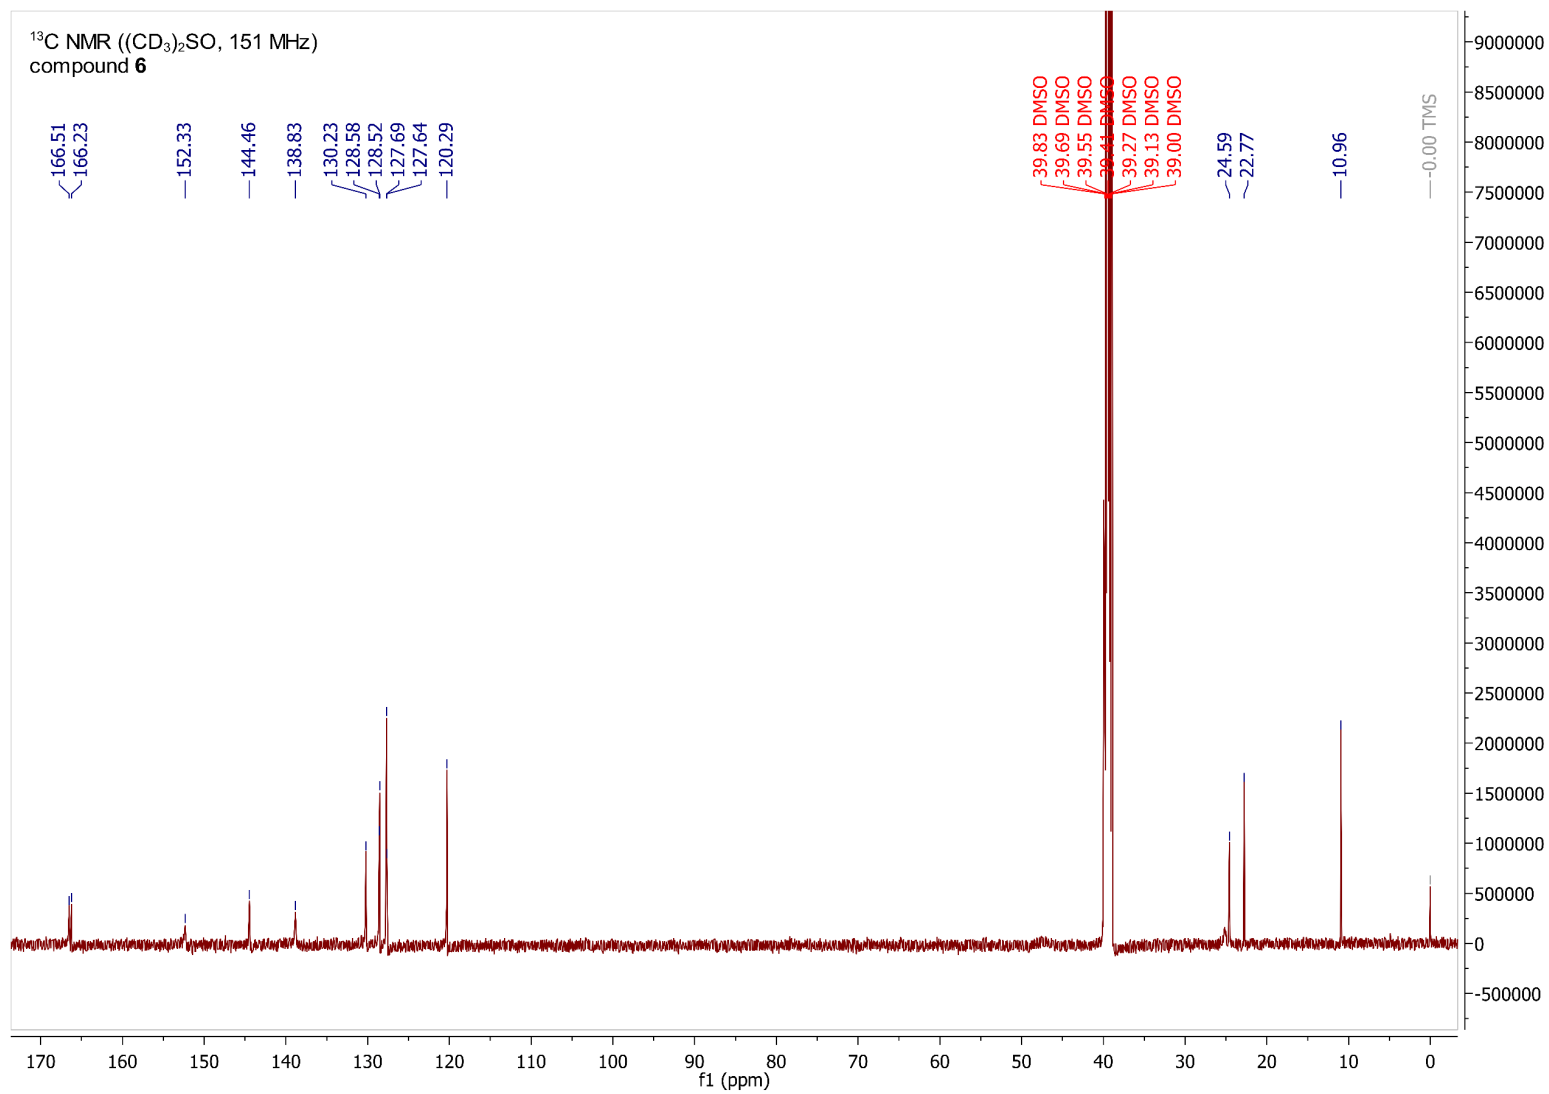

Figure S25.  $^1\text{H}$  NMR spectrum of pyropropioamH[Zn(quin) $_3$ ] (**7**) in DMSO- $d_6$ .

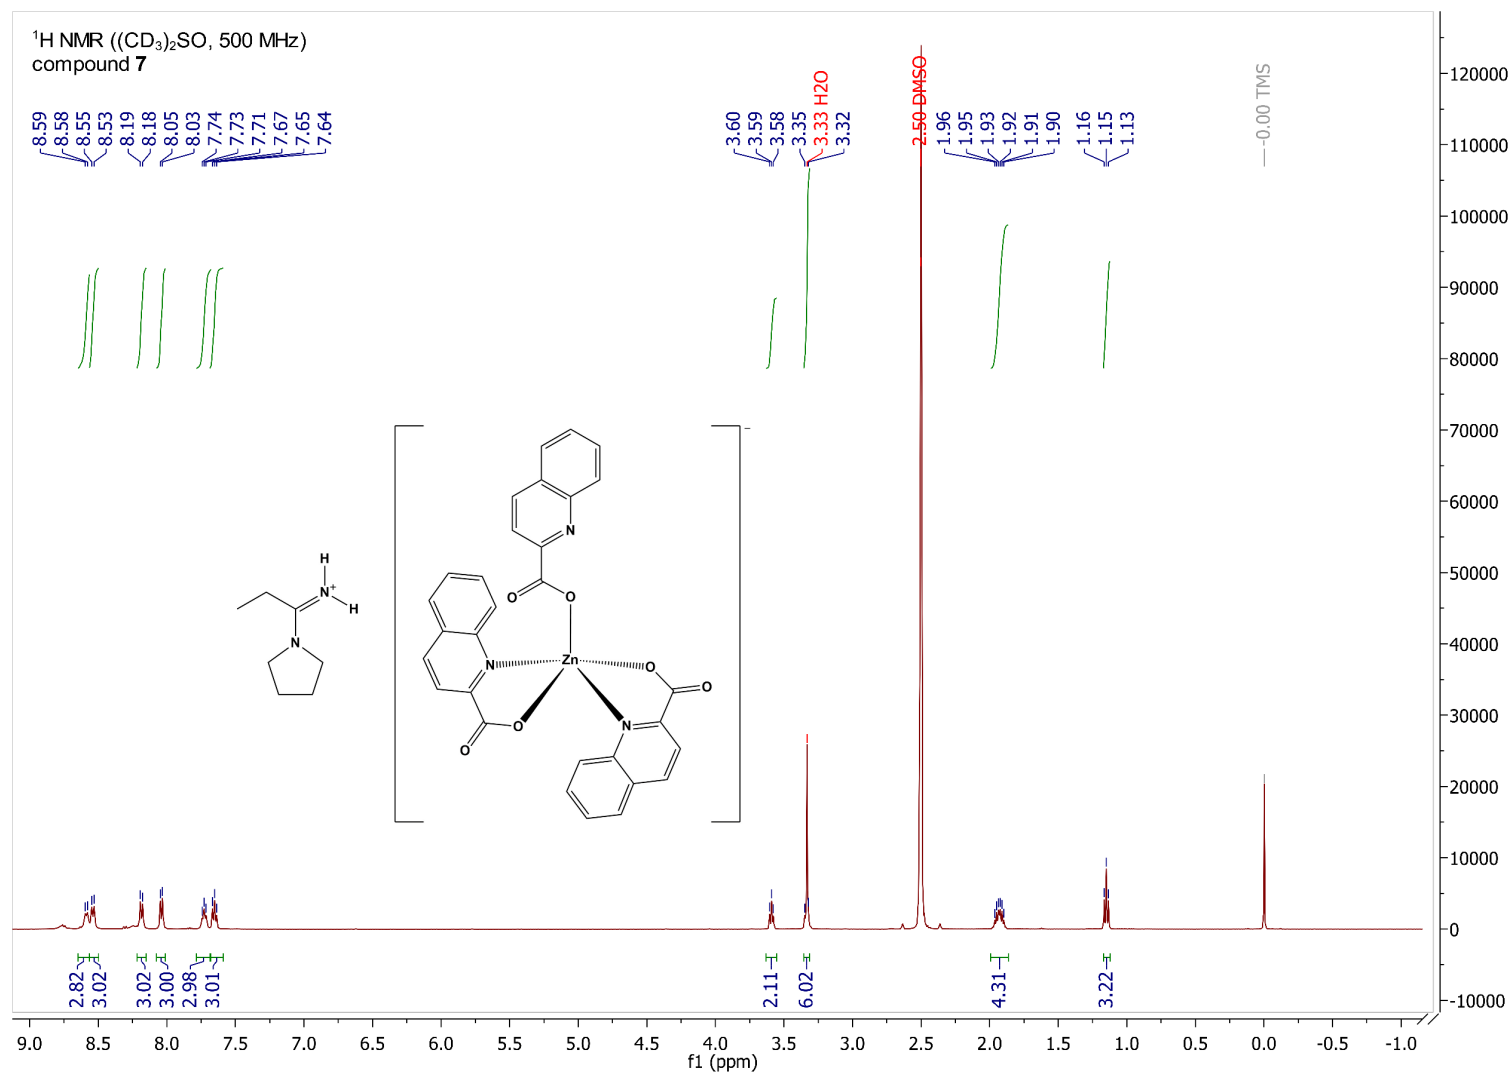

**Figure S26.**  $^{13}\text{C}$  NMR spectrum of pyropropioamH[Zn(quin) $_3$ ] (**7**) in DMSO- $d_6$ .

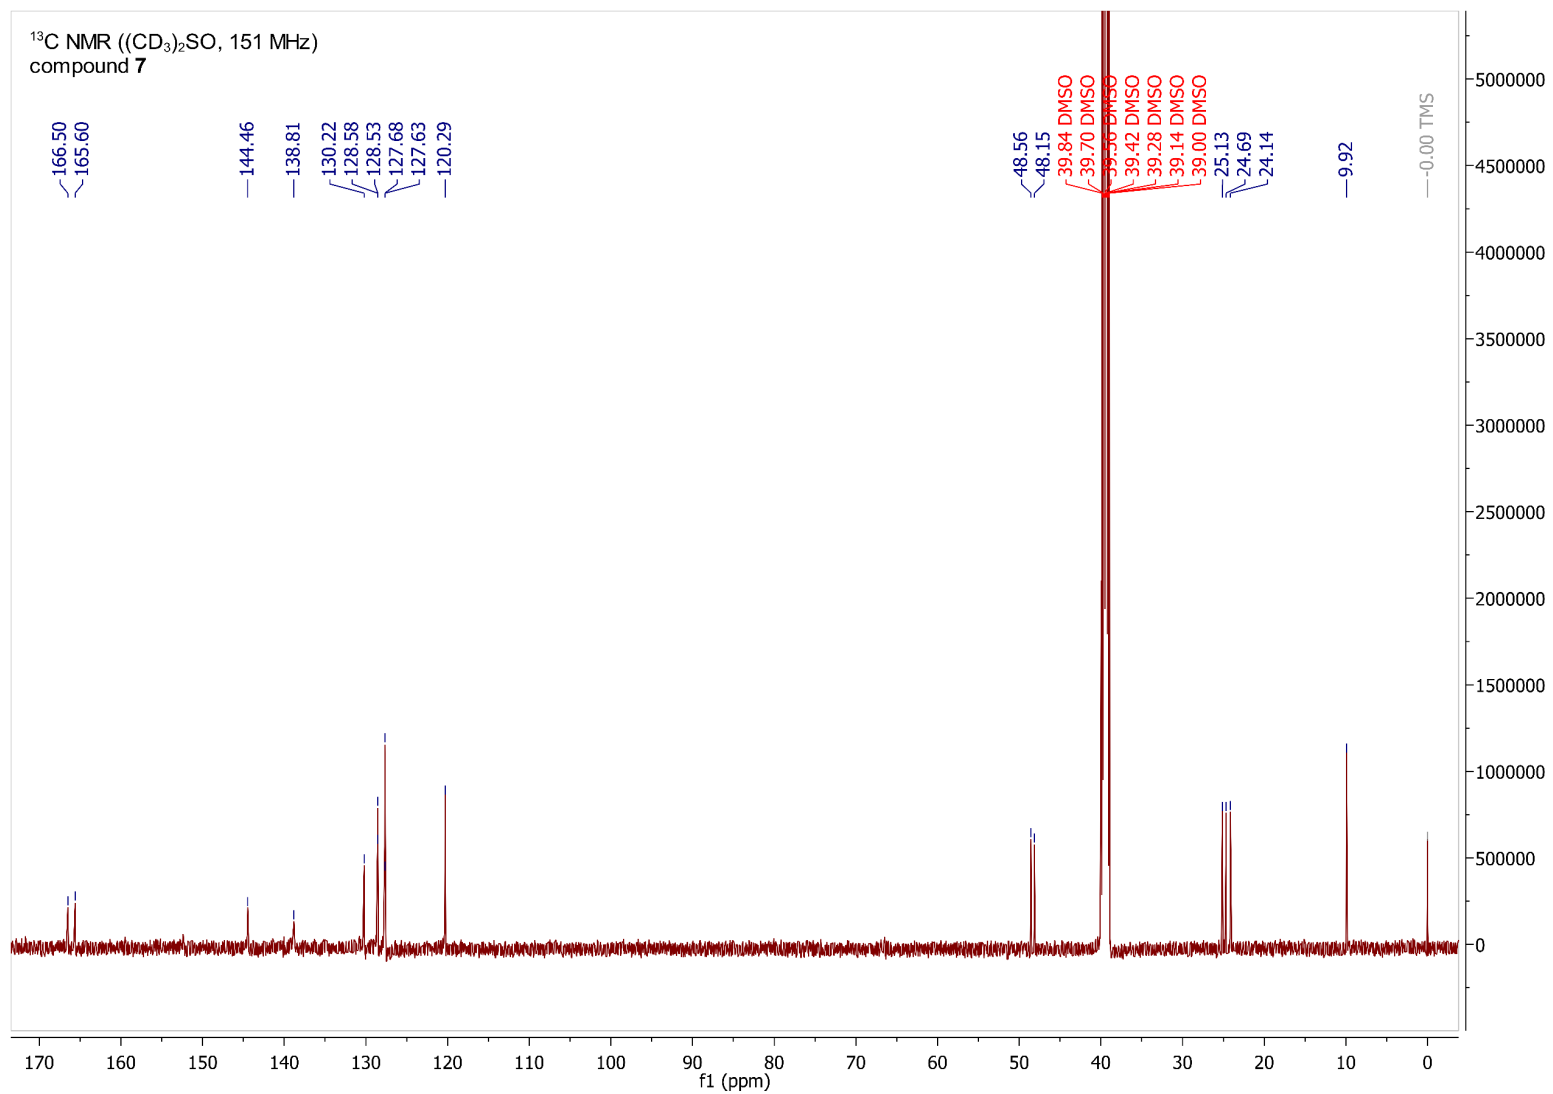

Figure S27.  $^1\text{H}$  NMR spectrum of  $[\text{Zn}(\text{quin})_2(\text{pipebenzoam})]$  (**8**) in  $\text{DMSO-}d_6$ .

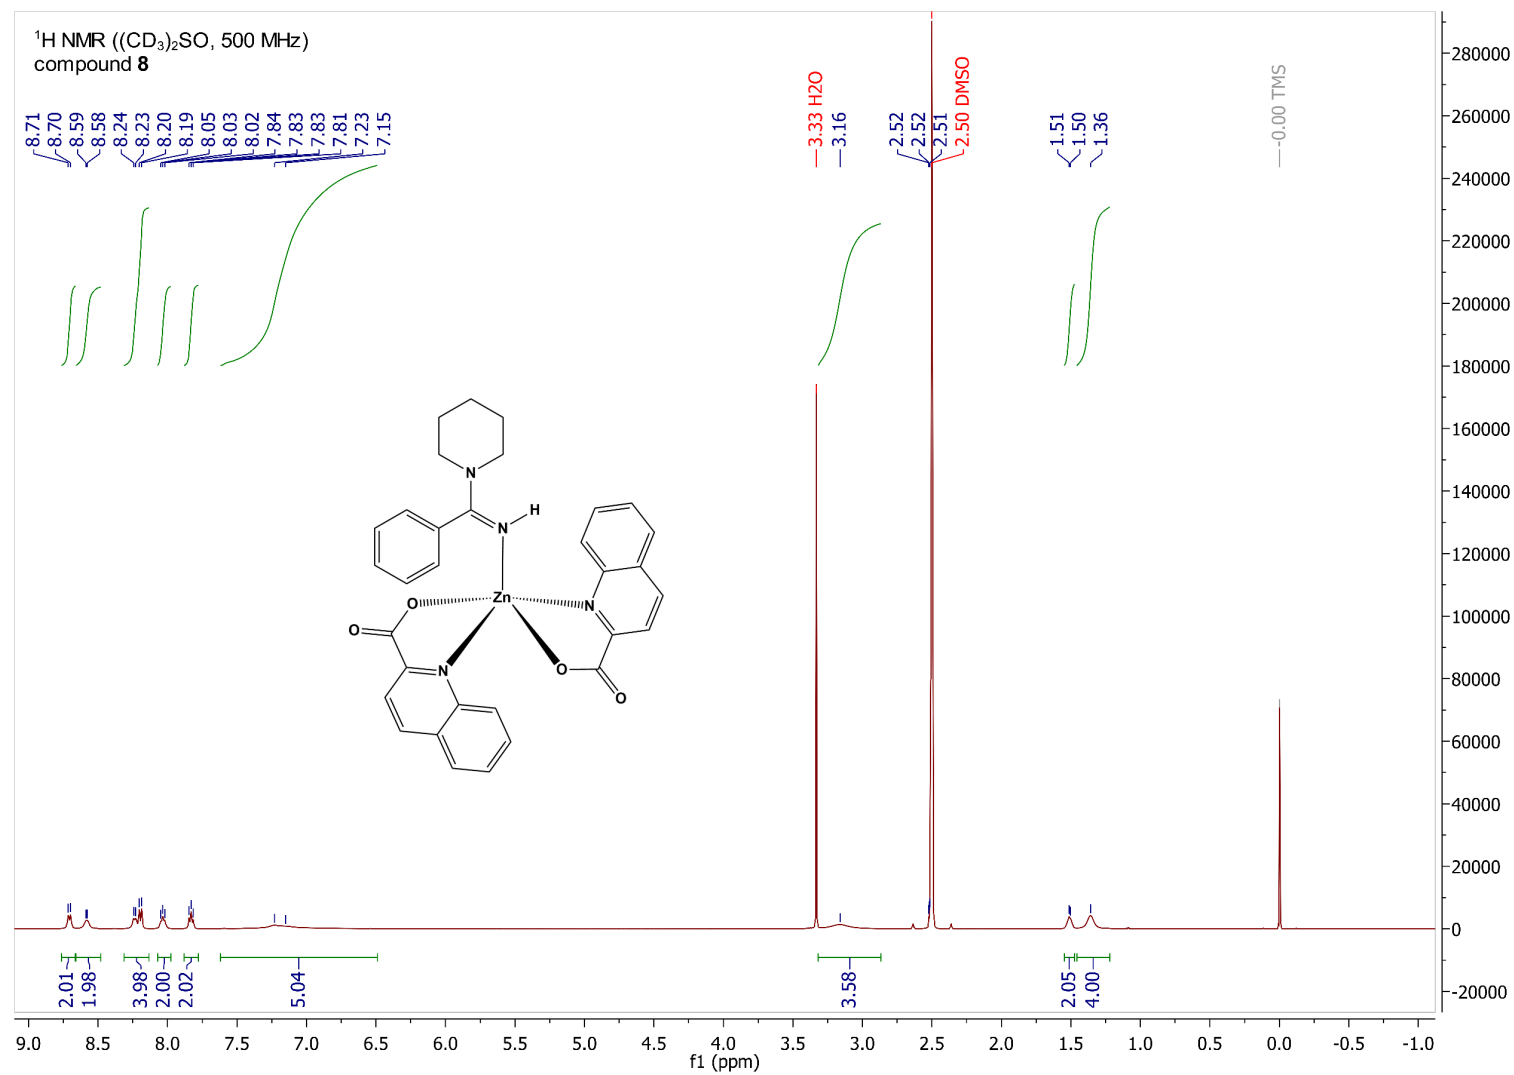

Figure S28.  $^{13}\text{C}$  NMR spectrum of  $[\text{Zn}(\text{quin})_2(\text{pipebenzoam})]$  (**8**) in  $\text{DMSO-}d_6$ .

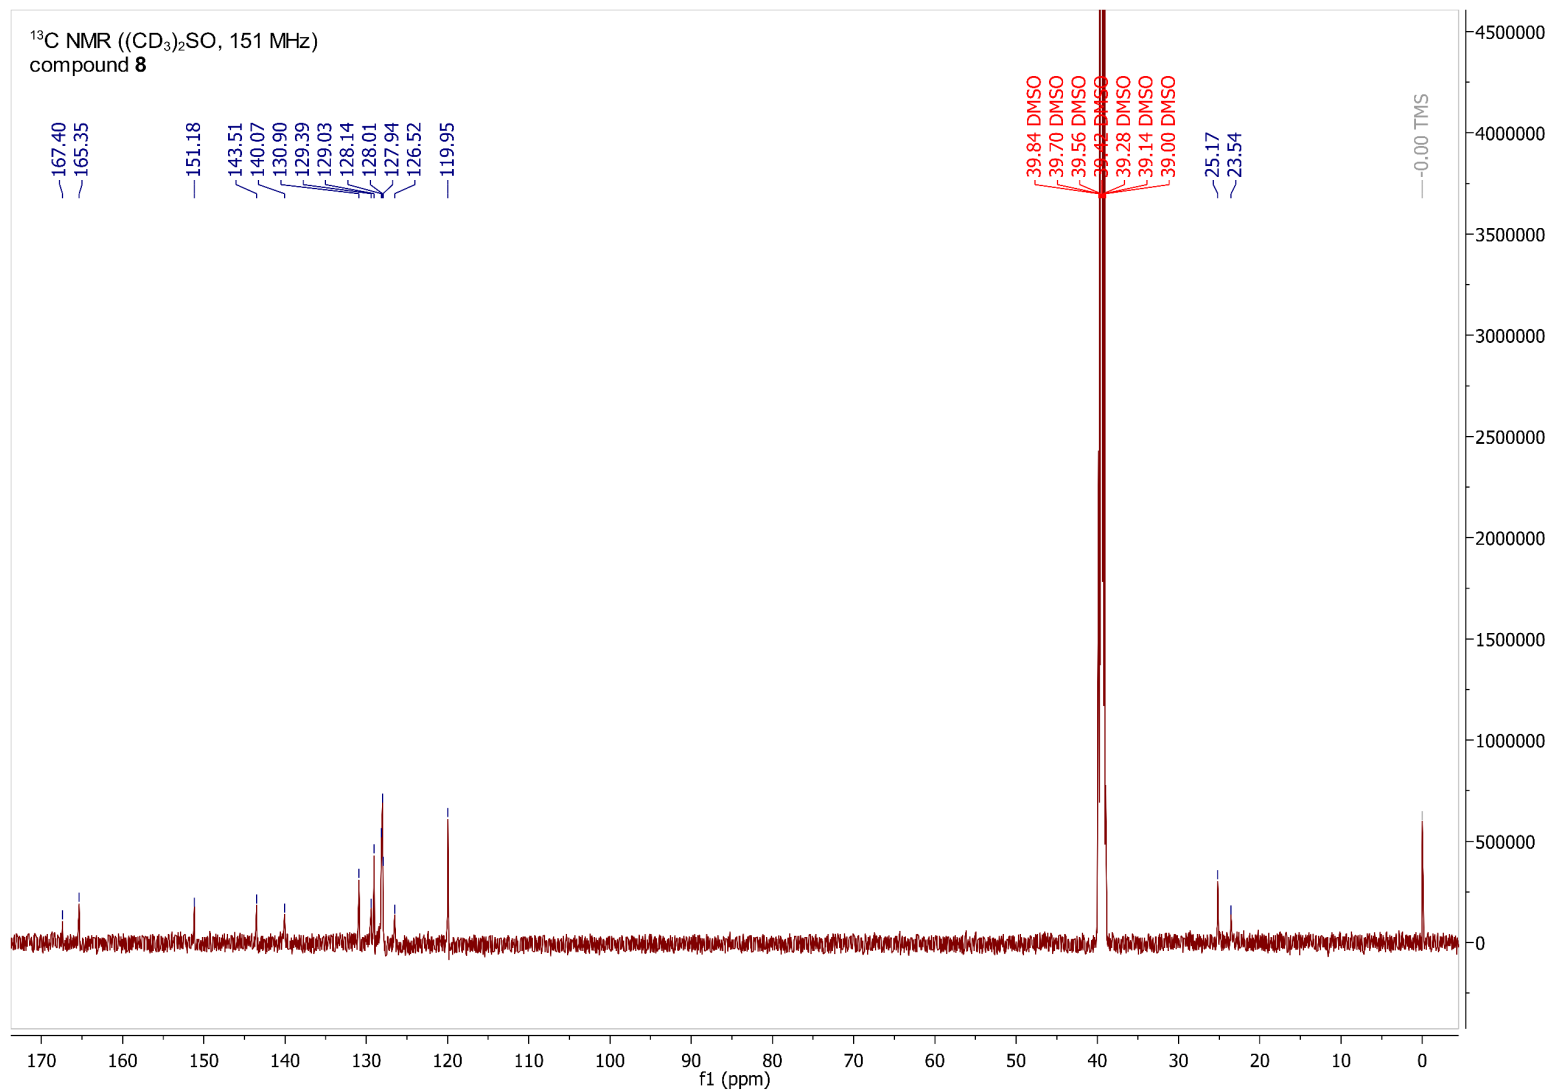



Figure S29.  $^1\text{H}$  NMR spectrum of  $[\text{Zn}(\text{qin})_2(\text{pyrobenzoam})]$  (**9**) in  $\text{DMSO-}d_6$ .

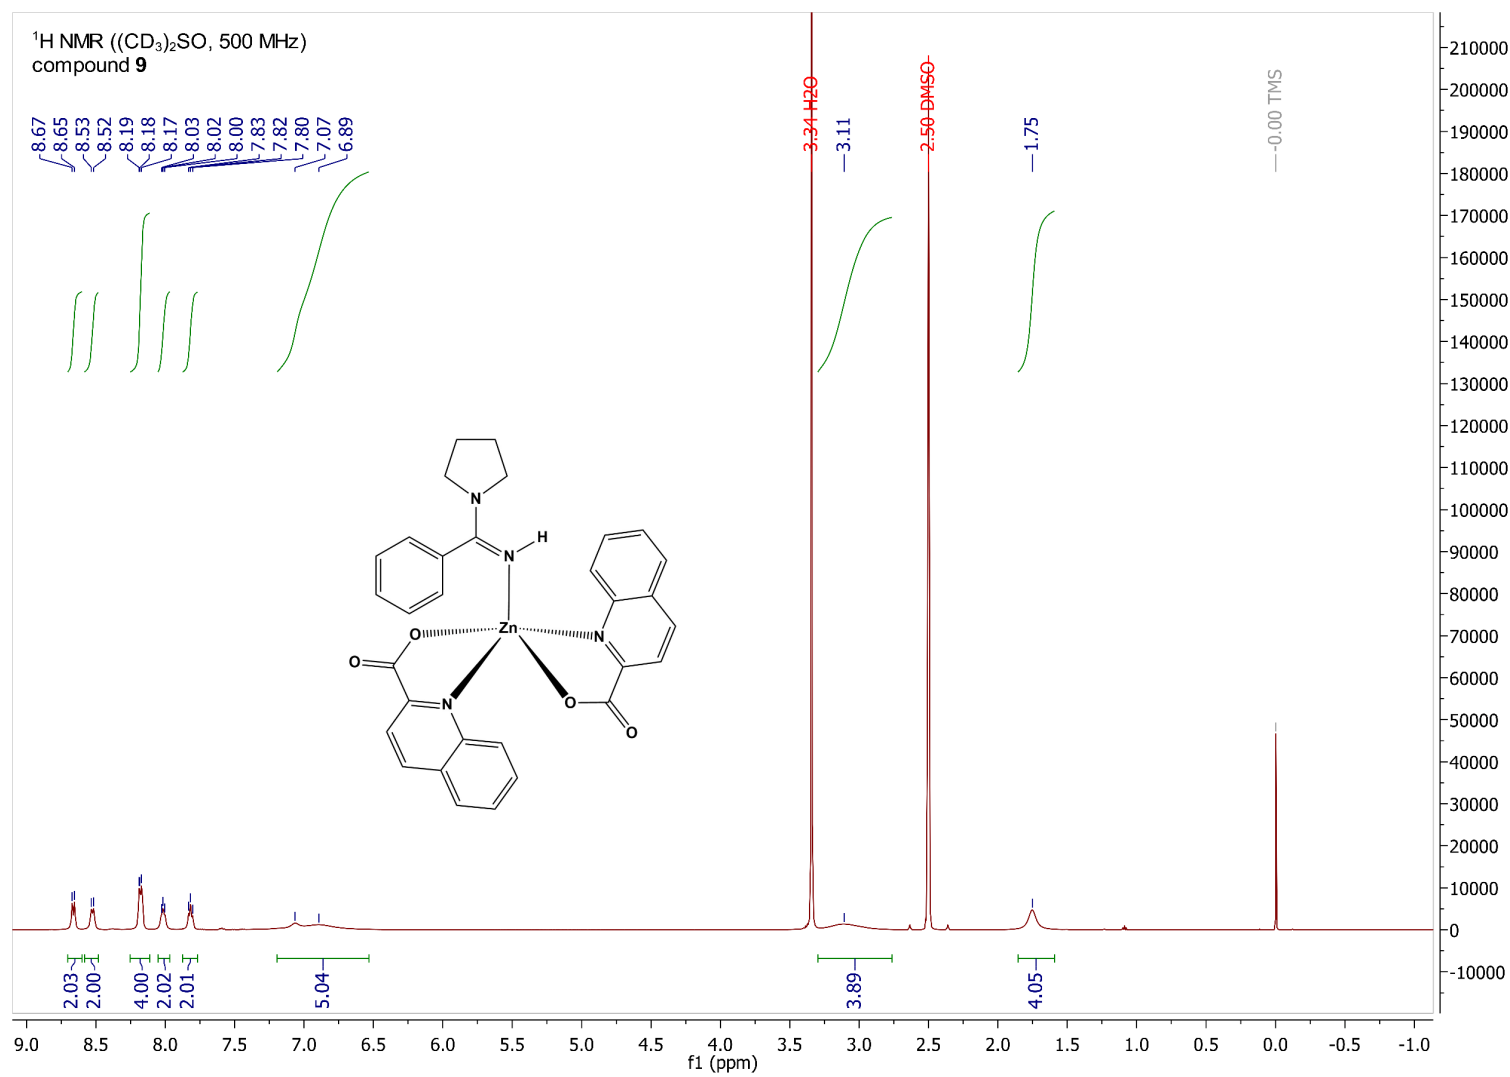

**Figure S30.**  $^{13}\text{C}$  NMR spectrum of  $[\text{Zn}(\text{qin})_2(\text{pyrobenzoam})]$  (**9**) in  $\text{DMSO-}d_6$ .

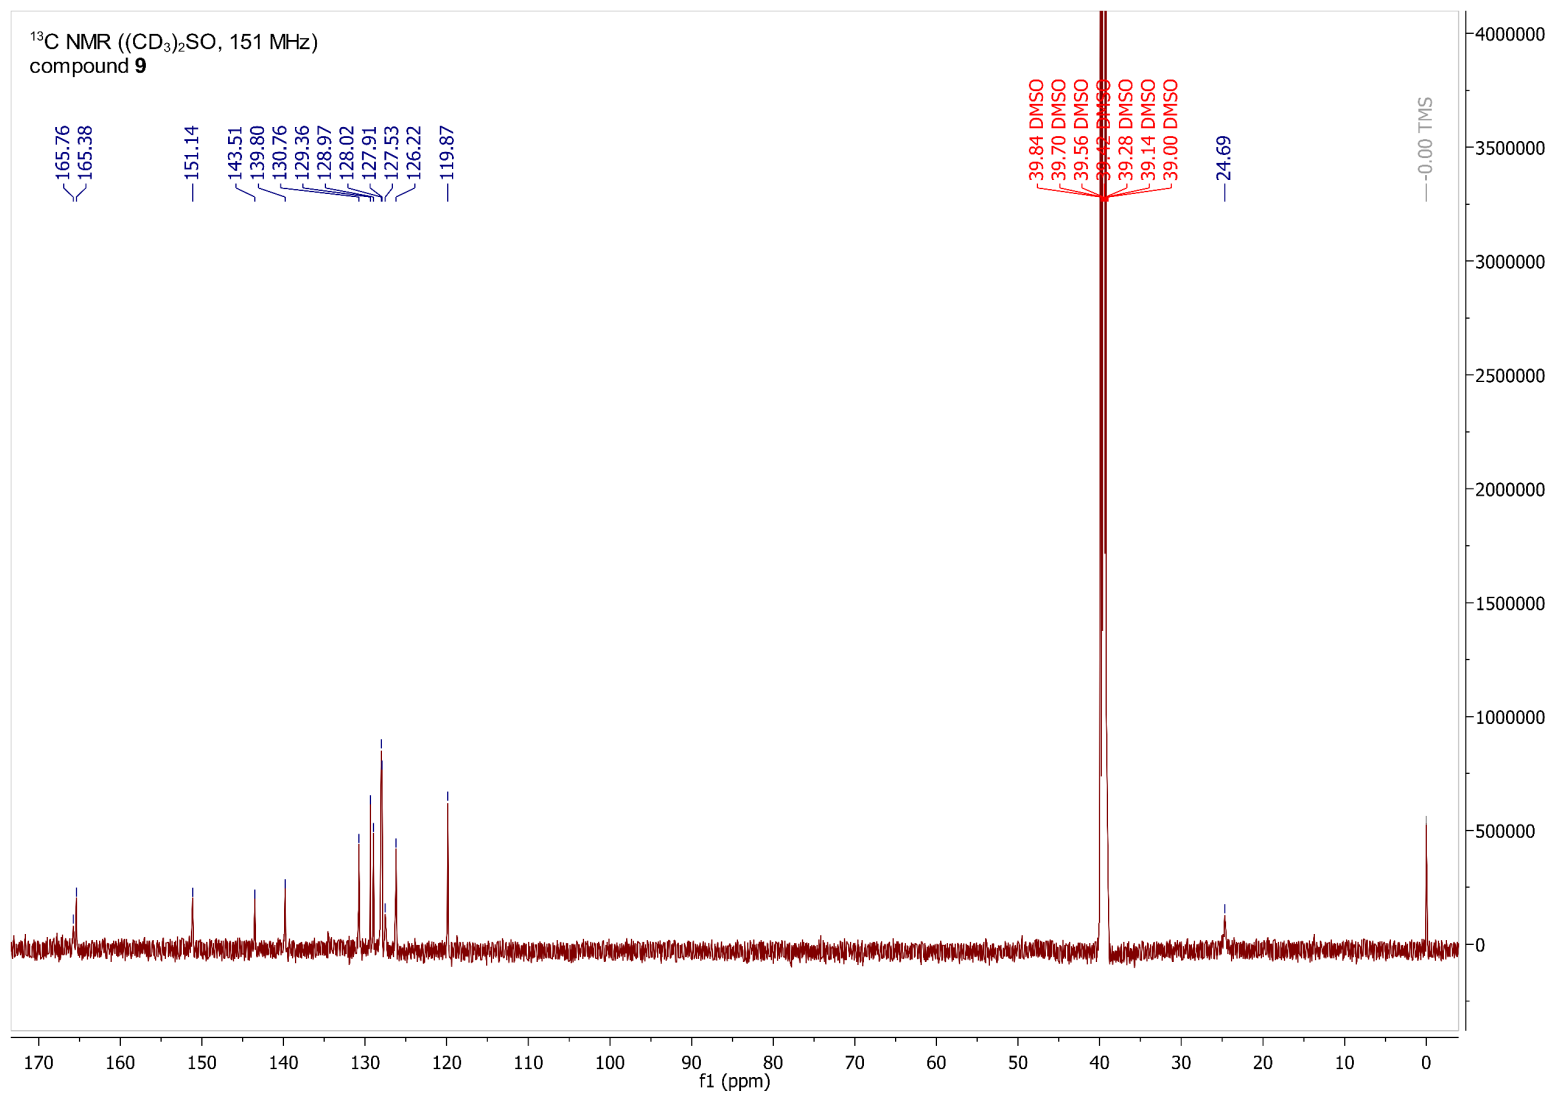

Figure S31.  $^1\text{H}$  NMR spectrum of pipebenzoamH[Zn(quin) $_3$ ] (**10**) in DMSO- $d_6$ .

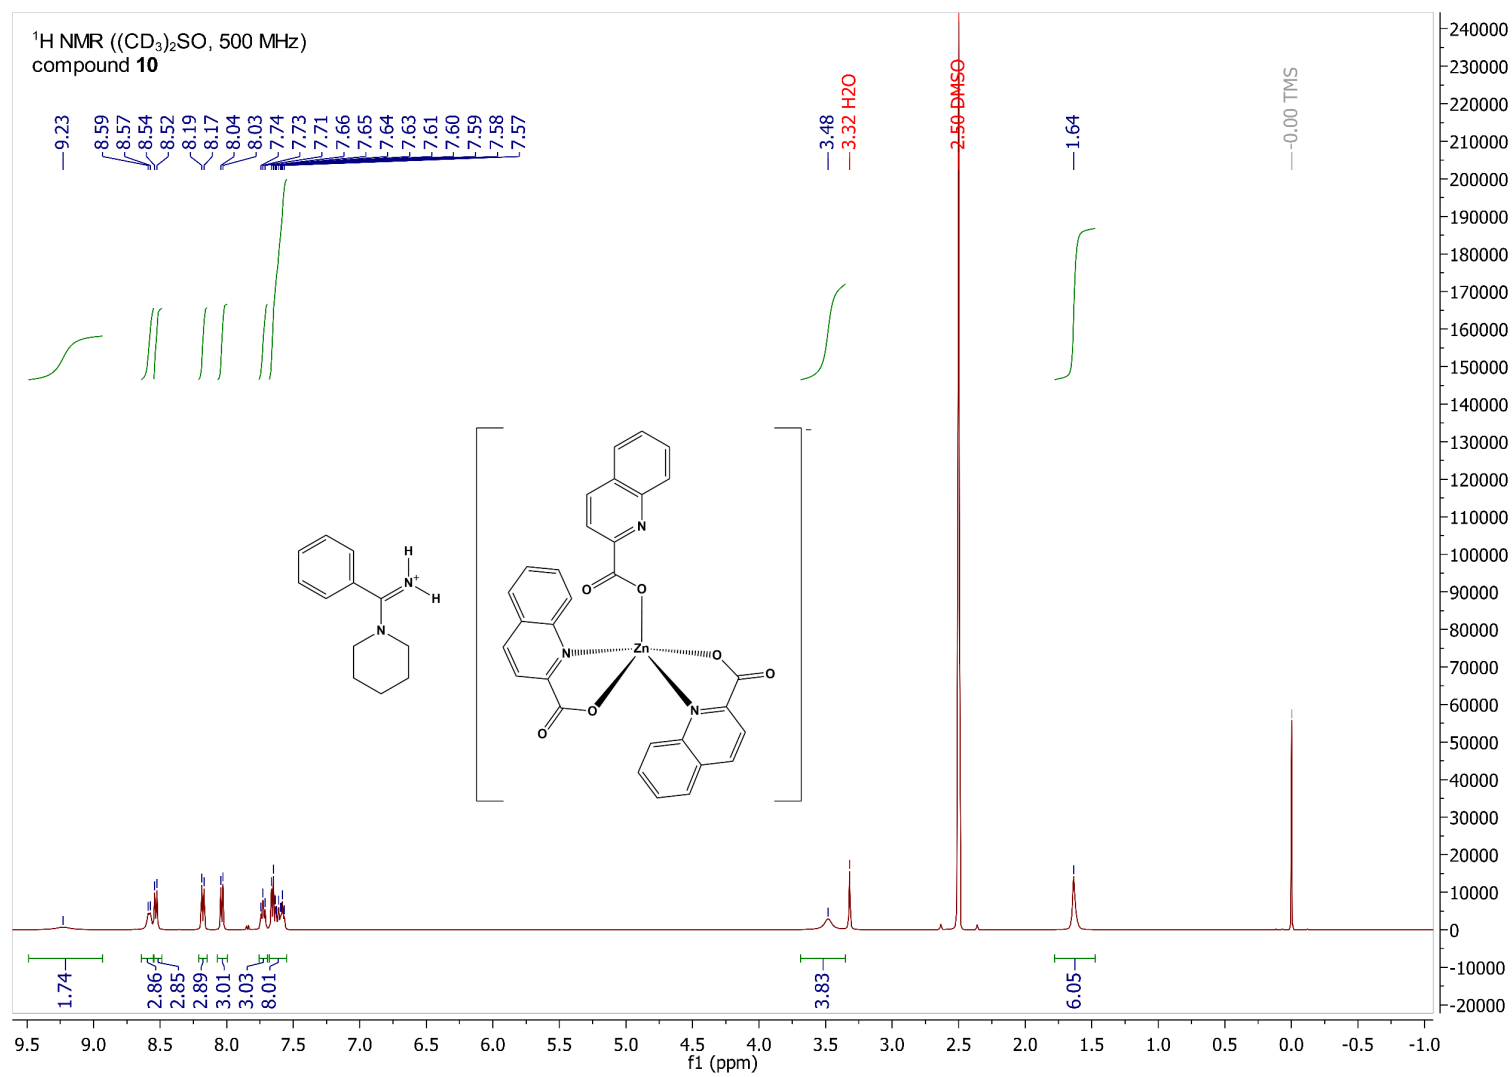

**Figure S32.**  $^{13}\text{C}$  NMR spectrum of pipebenzoamH[Zn(quin) $_3$ ] (**10**) in DMSO- $d_6$ .

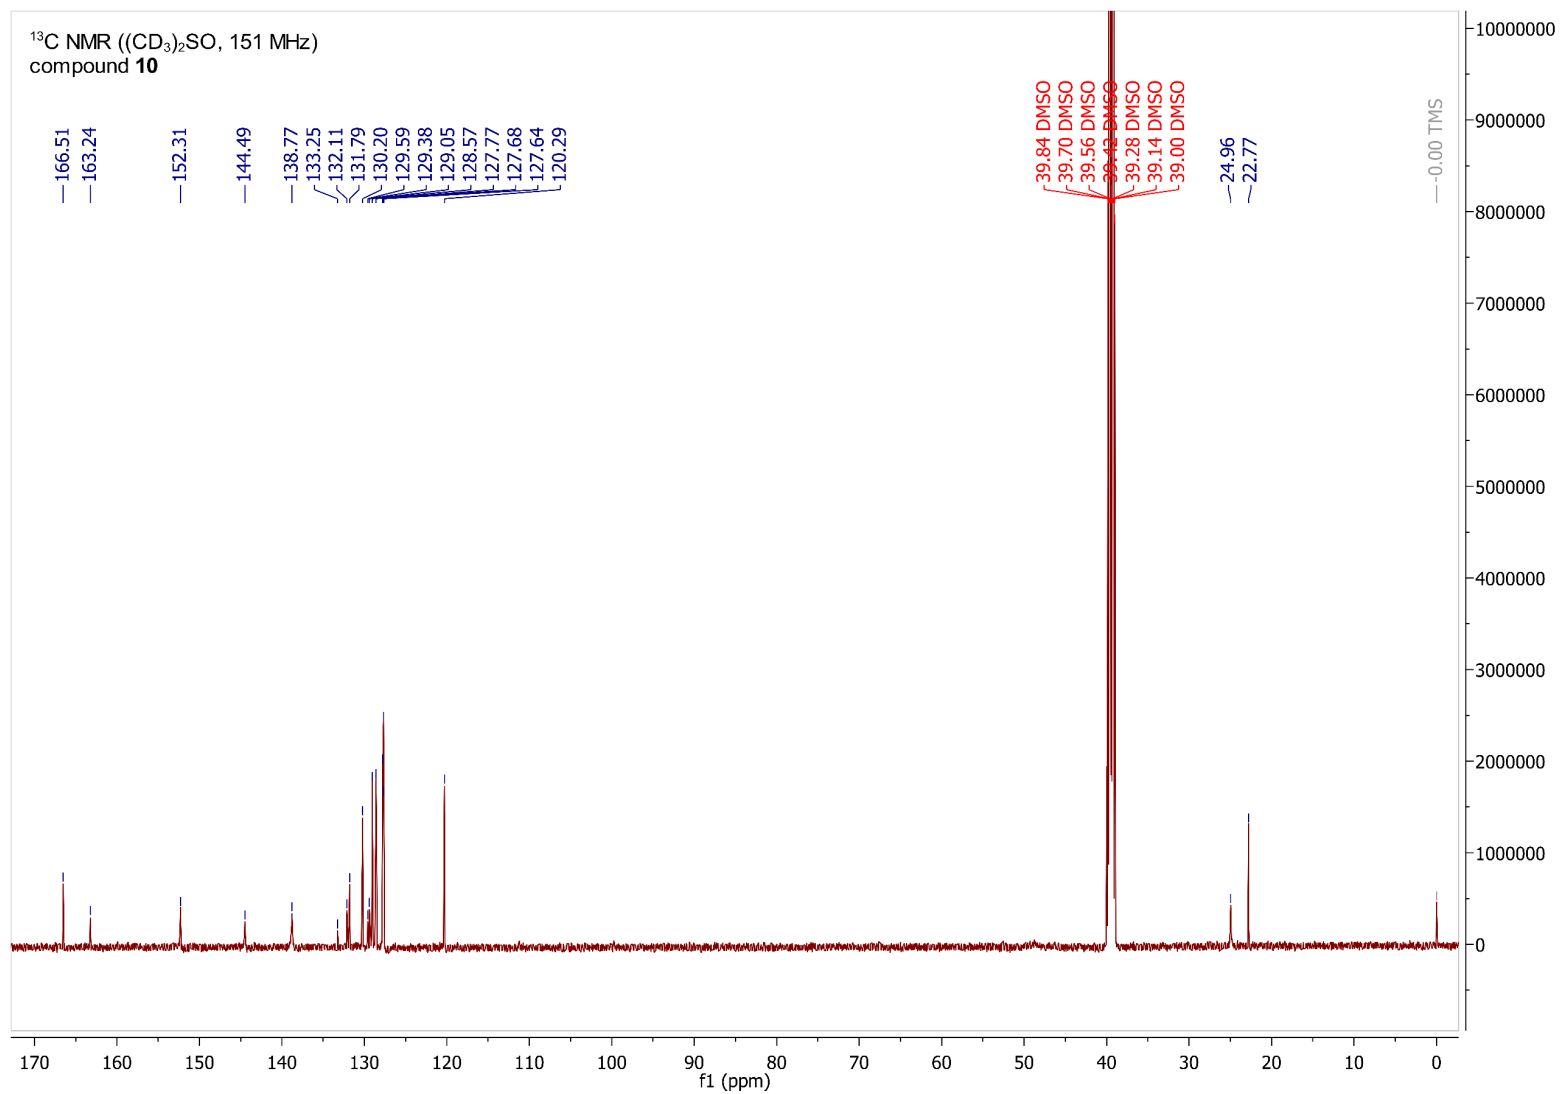

Figure S33.  $^1\text{H}$  NMR spectrum of pyrobenzoamH[Zn(quin) $_3$ ] (**11**) in DMSO- $d_6$ .

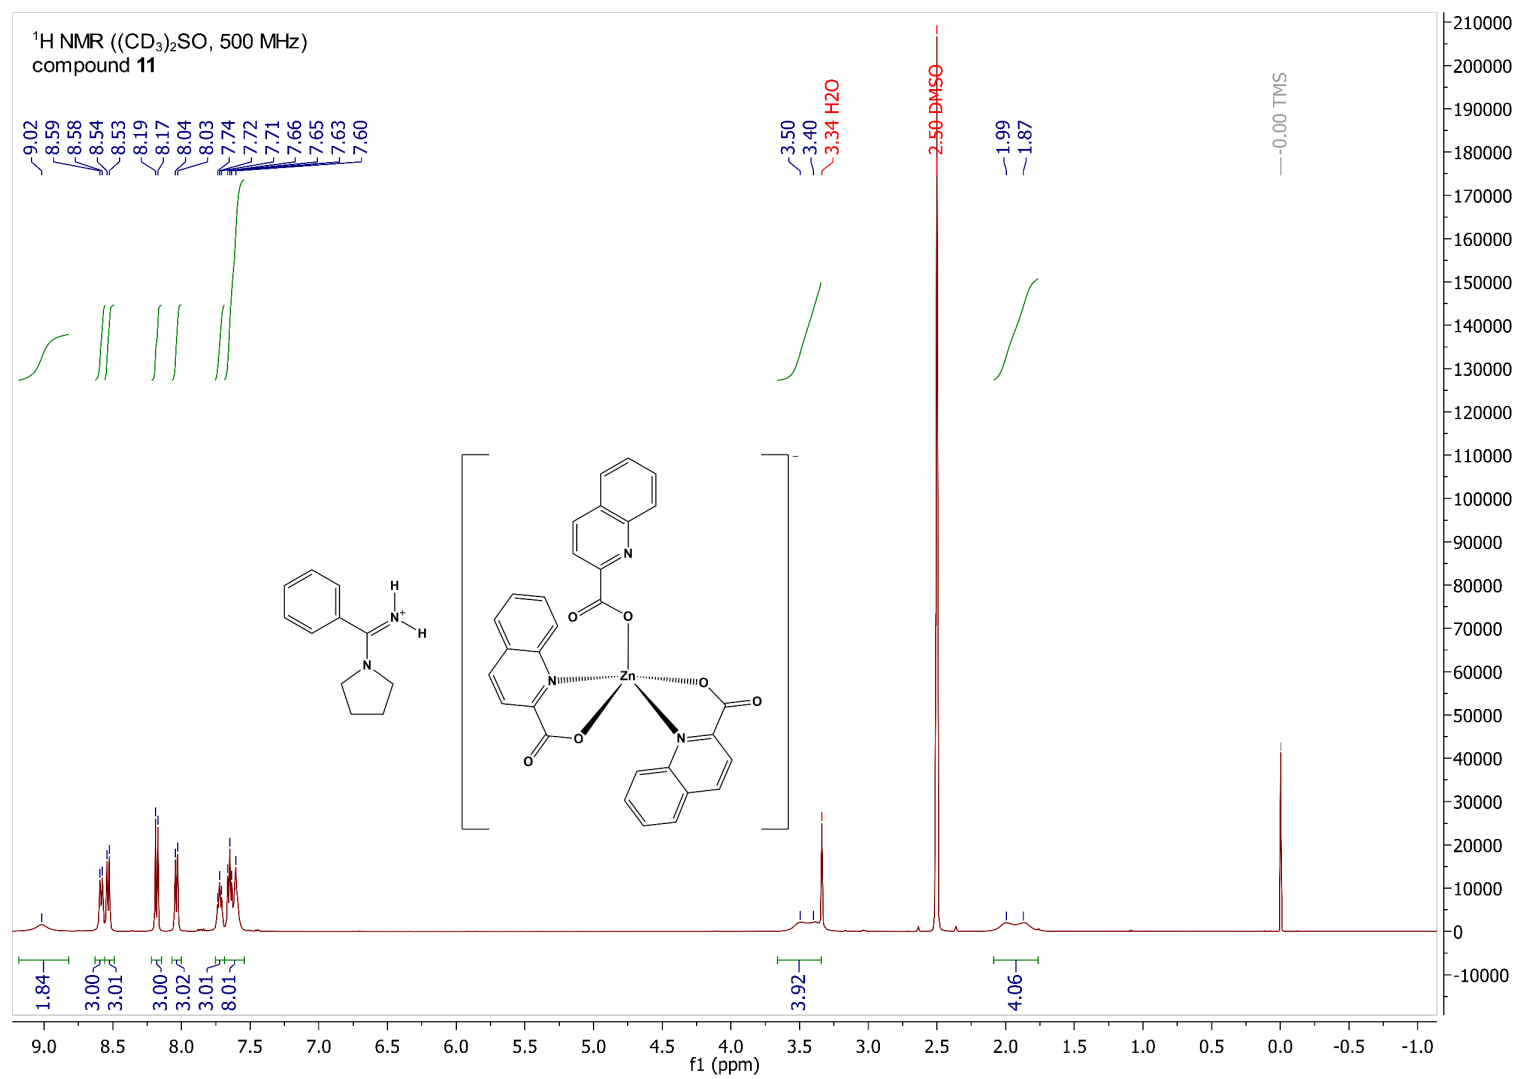

**Figure S34.**  $^{13}\text{C}$  NMR spectrum of pyrobenzoamH[Zn(quin) $_3$ ] (**11**) in DMSO- $d_6$ .

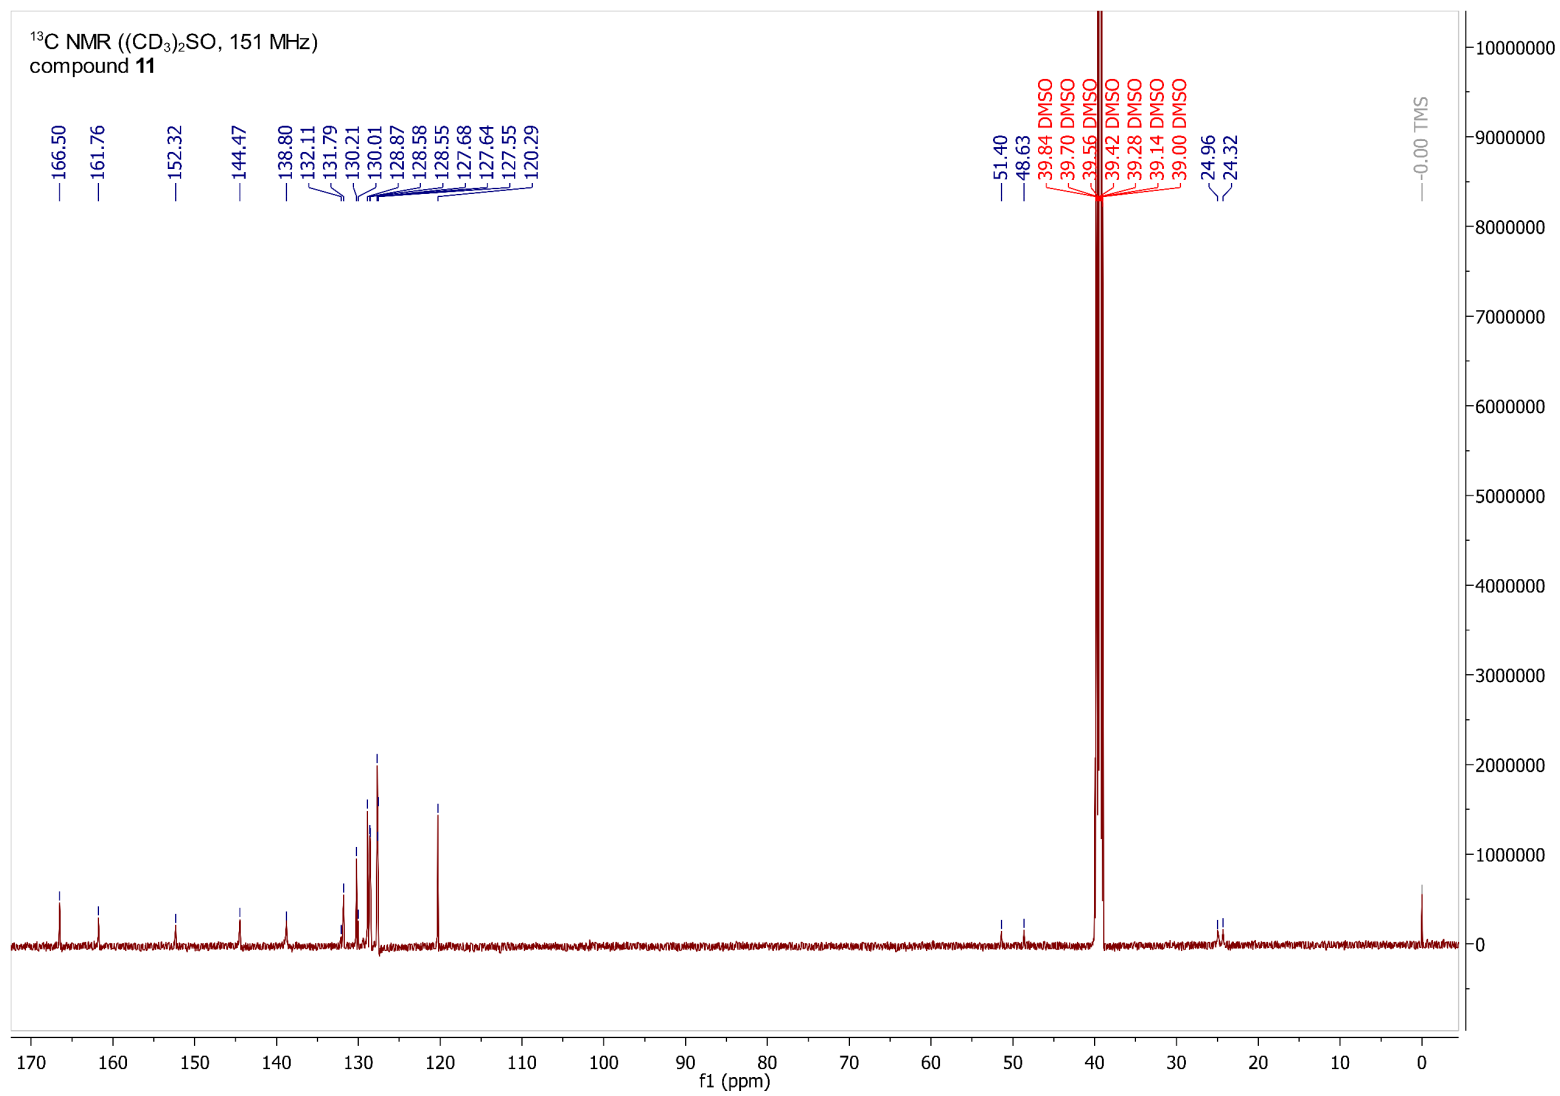

Supplement: d2nj04668g1.pdf [file d2nj04668g1.pdf]
